# 1 Sarbecovirus RBD indels and specific residues dictating ACE2 multi-species adaptiveness

2 Junyu Si<sup>1,#</sup>, Yuanmei Chen<sup>1,#</sup>, Mengxue Gu<sup>1</sup>, Yehui Sun<sup>1</sup>, Meiling Huang<sup>1</sup>, Lulu Shi<sup>1</sup>, Xiao Yu<sup>1</sup>, Xiao  
3 Yang<sup>1</sup>, Qing Xiong<sup>1</sup>, Chenbao Ma<sup>1</sup>, Peng Liu<sup>1</sup>, Zheng-Li Shi<sup>2</sup>, Huan Yan<sup>1,\*</sup>

4 <sup>1</sup>State Key Laboratory of Virology, College of Life Sciences, TaiKang Center for Life and Medical  
5 Sciences, Wuhan University, Wuhan, Hubei, China.

6 <sup>2</sup>Wuhan Institute of Virology, Chinese Academy of Sciences, Wuhan, China.

7 <sup>#</sup>These authors contributed equally to this work.

8 <sup>\*</sup>Correspondence: [huanyan@whu.edu.cn](mailto:huanyan@whu.edu.cn)

9

## 10 Summary

11 Sarbecoviruses exhibit varying abilities in using angiotensin-converting enzyme 2 (ACE2)  
12 receptor<sup>1-3</sup>. However, a comprehensive understanding of their multi-species ACE2 adaptiveness and  
13 the underlying mechanism remains elusive, particularly for many sarbecoviruses with various receptor  
14 binding motif (RBM) insertions/deletions (indels)<sup>4-11</sup>. Here, we analyzed RBM sequences from 268  
15 sarbecoviruses categorized into four RBM indel types. We extensively examined the capability of 14  
16 representative sarbecoviruses and their derivatives in using ACE2 orthologues from 51 bats and five  
17 non-bat mammals. We revealed that most sarbecoviruses with longer RBMs (type-I), present broad  
18 ACE2 tropism, whereas viruses with single deletions in Region 1 (type-II) or Region 2 (type-III)  
19 generally exhibit narrow ACE2 tropism, typically favoring their hosts' ACE2. Sarbecoviruses with  
20 double region deletions (type-IV) exhibit a complete loss of ACE2 usage. Subsequent investigations  
21 unveiled that both loop deletions and critical RBM residues significantly impact multi-species ACE2  
22 tropism in different ways. Additionally, fine mapping based on type-IV sarbecoviruses elucidated the  
23 role of several clade-specific residues, both within and outside the RBM, in restricting ACE2 usage.  
24 Lastly, we hypothesized the evolution of sarbecovirus RBM indels and illustrated how loop length,  
25 disulfide, and adaptive mutations shape their multi-species ACE2 adaptiveness. This study provides  
26 profound insights into the mechanisms governing ACE2 usage and spillover risks of sarbecoviruses.

27 **Keywords:** ACE2, sarbecoviruses, indel, ACE2 adaptiveness, receptor binding motif

28

29

## 30 Introduction

31 The Severe Acute Respiratory Syndrome (SARS) outbreak and COVID-19 pandemic  
32 significantly raised awareness of the zoonotic risks posed by sarbecoviruses<sup>12,13</sup>. The *Sarbecovirus*  
33 subgenus, also known as lineage B  $\beta$ -coronaviruses, encompasses hundreds of SARS-related viruses  
34 exhibiting varying RBM sequences<sup>1,3-9,14-16</sup>. Most sarbecoviruses naturally infect rhinolophus bats, the  
35 primary natural reservoir for these viruses<sup>2,17-19</sup>. Additionally, sarbecoviruses sharing high receptor  
36 binding domain (RBD) similarity to SARS-CoV-2 have been identified in pangolins, such as GX-P2V  
37 and GD/1/2019<sup>9,20</sup>. Sarbecoviruses exhibit extensive genetic diversity in RBM, likely arising from  
38 frequent recombination and the high selective pressure associated with inter-species host jumping in  
39 bats and pangolins, underscoring the risks of the emergence and outbreak of new human  
40 sarbecovirus<sup>21-25</sup>. However, many sarbecoviruses are known only as viral sequences and their ability  
41 to jump species and spill over to humans remains unclear.

42 Although ACE2 has been documented as a receptor for selected groups of setracovirus (e.g.,  
43 NL63) and merbecoviruses (e.g., NeoCoV)<sup>26,27</sup>, it remains primarily recognized as the receptor for  
44 sarbecoviruses<sup>1,9,24</sup>. Notably, not all sarbecoviruses have been confirmed to use ACE2 as their receptor,  
45 especially clade 2 sarbecoviruses, which are proposed to utilize a yet unidentified receptor<sup>1-3</sup>.  
46 Nevertheless, ACE2 usage has been demonstrated in most representative sarbecoviruses other than  
47 clade 2 sarbecoviruses<sup>1</sup>. Structural analysis of ACE2 in complex with RBD from various  
48 sarbecoviruses reveals a similar interaction mode, albeit with variations in specific residues involved  
49 in recognition. The bridge-shaped RBM spanning amino acid (aa) 439-508, formed by an extended  
50 loop connecting two  $\beta$  strands of the RBD core subdomain and with disulfide-bridging, interacts with  
51 ACE2 through two distinct patches<sup>28,29</sup>. The interface on ACE2 mainly comprises the amino-terminal  
52 (N-terminal)  $\alpha$ 1-helix, along with limited interactions with the  $\alpha$ 2 helix and a loop connecting the  $\beta$ 3  
53 and  $\beta$ 4 strands<sup>28</sup>.

54 Given the pivotal role of receptor recognition in governing host tropism, assessing multi-species  
55 ACE2 usage for sarbecoviruses with distinct RBM features is crucial for understanding their zoonotic  
56 potential. Previous studies have provided substantial insight into distinct receptor preferences among  
57 bats and other mammals for SARS-CoV-1, SARS-CoV-2, GX-P2V, RaTG13, NeoCoV, and  
58 others<sup>22,24,27,30-33</sup>. Varying entry-supporting abilities have also been observed in ACE2 orthologues  
59 from the same bat species but with different polymorphisms, particularly in residues involved in

60 sarbecovirus binding<sup>23,33,34</sup>.

61 Sarbecoviruses are commonly classified into several clades based on the RBD phylogeny and  
62 ACE2 usage<sup>1,3,25</sup>. Despite sharing a similar RBD core subdomain, sarbecoviruses exhibit significant  
63 variation in RBMs, particularly the presence of various indels in Region 1 (aa443-450) or Region 2  
64 (aa470-491) relative to SARS-CoV-2<sup>3,35</sup>. Clade 1 includes ACE2-using sarbecoviruses consisting of  
65 subclades 1a and 1b based on RBD phylogenetic relationships<sup>1</sup>. Most clade 1a (SARS-CoV-1 lineage)  
66 and 1b (SARS-CoV-2 lineage) sarbecoviruses have the longest RBM and do not carry RBM deletions<sup>1</sup>.  
67 Several sarbecoviruses with Region 1 or 2 single RBM deletions that are discovered phylogenetically  
68 related to clade 1b viruses, such as RshSTT182, RshSTT200<sup>10</sup>, Rc-o319 and Rc-kw8<sup>4</sup>, that recently  
69 found in Cambodia and Japan, respectively. Clade 1c, including RmYN05, RaTG15, and RsYN04,  
70 previously defined as clade 4 sarbecoviruses in some studies, were recently reported and belong to a  
71 subgroup of Asia sarbecoviruses carrying single Region 1 deletions<sup>5,6,11</sup>. We designated these  
72 sarbecoviruses 1c subclade considering their RBD phylogeny, geographical distribution, and ACE2  
73 usage compared with 1a and 1b. Clade 2 sarbecoviruses are phylogenetically close to clade 1 and  
74 characterized by the presence of two deletions (indels) within the RBM<sup>1-3,17,19,36-38</sup>. Clade 3  
75 sarbecoviruses, such as BM48-31, Khosta-1/2, BtKY72, and PRD-0038, discovered in Africa and  
76 Europe are considered closer to the sarbecovirus ancestors and all carry single deletions (indels) in the  
77 first RBM region (corresponding to aa443-450 of SARS-CoV-2)<sup>1,8,35,39-41</sup>. Several clade 3  
78 sarbecoviruses have demonstrated ACE2 usage, suggesting it as an ancestral trait of  
79 sarbecoviruses<sup>1,36,42,43</sup>. Although proposed to have evolved from ACE2-using ancestors through the  
80 subsequent loss of ACE2 recognition<sup>1,35</sup>, whether all clade 2 sarbecoviruses have lost ACE2 usage  
81 across all ACE2 orthologues remain open.

82 Our understanding of the key determinants affecting sarbecoviruses ACE2 adaptiveness and the  
83 factors restricting multi-species ACE2 usage remains incomplete. With an increasing number of  
84 sarbecoviruses identified with various single RBM indels, addressing the impact of these indels on  
85 multi-species ACE2 tropism becomes crucial. Moreover, sarbecoviruses with similar RBM deletion  
86 patterns exhibit marked differences in ACE2 tropism, emphasizing the role of critical RBD residues  
87 impacting multi-species ACE2 recognition beyond loop deletions<sup>22,23,36,44</sup>.

88 In this study, we analyzed the spike sequences of 268 sarbecoviruses to delineate the overall  
89 indel features and categorized them into four RBM indel types. Employing an ACE2 library consisting

90 of 56 orthologues, we extensively evaluated cellular RBD binding and pseudovirus entry of 14  
91 representative sarbecoviruses and various derivatives, encompassing RBM loop chimera and  
92 mutations. Our data led to a more comprehensive understanding of the multi-species ACE2  
93 adaptiveness across sarbecoviruses, as well as the coevolution of RBM indels and ACE2 adaptiveness.

94

## 95 **Results**

### 96 **Four RBM indel types for sarbecoviruses**

97 We retrieved 2318 Non-human  $\beta$ -coronavirus spike sequences from the NCBI and GISAID  
98 databases, with 876 distinguished as sarbecovirus based on phylogenetic analysis. After reducing  
99 redundancy by excluding identical sequences and those highly similar to SARS-CoV-1 and SARS-  
100 CoV-2 (>99% identity), we obtained 268 sarbecovirus spike sequences for subsequent investigation,  
101 consisting of 17 pangolin sarbecoviruses and 248 bat sarbecovirus, as well as 3 representative human  
102 sarbecoviruses ([Fig. 1a](#) and [Supplementary data S1](#)). Phylogenetic analysis based on RBD protein  
103 sequences revealed five sub-clades, with clade 2 accounting for the largest number ([Fig. 1b](#), [Extended](#)  
104 [Data Fig.1](#)). Multi-sequence alignment and Sequence Logo analysis highlighted three highly variable  
105 regions in RBMs, with Regions 1 and 2, but not Region 3, being the hot spots of loop indels ([Fig. 1c](#),  
106 [Supplementary data S2](#)).

107 RBM sequences of 23 representative sarbecoviruses spanning different clades were displayed to  
108 cover the sarbecoviruses with diversified RBM features ([Fig. 1d](#)). Amino acid identity analyses  
109 revealed that these sarbecoviruses share at least 65% spike identity and 57.84% RBD identity, whereas  
110 RBM identity can be as low as 21.54%, suggesting greater genetic variation in RBM ([Extended Data](#)  
111 [Fig. 2a-c](#)). To better investigate the impact of RBM indels on multi-species ACE2 adaptiveness, we  
112 categorized sarbecoviruses into four RBM indel types in addition to the clade-based classification.  
113 Specifically, RBM type-I describes most clade 1a and 1b sarbecoviruses with no RBM deletions (or  
114 with Region1 4aa insertions) and are considered as prototypes, RBM type-II and type-III are viruses  
115 with single RBM deletions in Region 1 or Region 2, respectively, while RBM type-IV viruses  
116 correspond to clade 2 viruses with dual RBM deletions ([Fig. 1d](#)).

117 Analyses of RBM deletions among the 268 sequences revealed 1 to 5 amino acid (aa) deletions  
118 in Region 1, and 1-, 9-, 13-, 14-aa deletions in Region 2 ([Fig. 1e](#)). For better classification, only  
119 deletions of 2aa or longer were applied for RBM typing. Interestingly, the 5aa deletion in Region 1 is

120 strictly linked to 13/14aa deletions in clade 2 sarbecoviruses. This classification resulted in different  
121 sarbecovirus subgroups compared to those based on RBD clades (Fig. 1f-g). For example, all clade 1a  
122 sarbecoviruses (SARS-CoV-1 lineage) are RBM type-I, while the more complicated clade 1b (SARS-  
123 CoV-2 lineage) encompasses viruses belonging to RBM type-I, II, or III. The clade 3 and clade 1c  
124 sarbecoviruses are all grouped to RBM type-II (Fig. 1g). The length of Region 1 and 2 deletions in  
125 each RBM type is demonstrated with type-specific features (Fig. 1h).

126 From a structural perspective, the spatially proximate Region 1 and Region 3 loops form  
127 interaction patch 2, while the majority of residues in Region 2 loop contribute to interaction patch 1  
128 (Fig. 1i). Interestingly, cysteine residues are rare in RBM, with only one highly conserved disulfide  
129 bridge for stabilizing loop in Region 2, which is absent in RBM type III and IV sarbecoviruses (Fig.  
130 1d, i)<sup>45</sup>. Superimposition of the solved or AlphaFold2-predicted RBDs with that of SARS-CoV-2  
131 highlighted notable differences in the extended loops carrying specific deletions (Fig. 1j). Given that  
132 the two deletions are situated in critical RBM extensions for ACE2 interaction, their presence is  
133 considered to impact multi-species ACE2 adaptiveness.

134 Given the unavailability of the authentic sarbecovirus strains, we employed a dual reporter-based  
135 vesicular stomatitis virus (VSV) pseudotyping system carrying sarbecovirus spikes to assess receptor  
136 functionality of various ACE2 orthologues (Fig. 1k, Extended Data Fig. 3a-c)<sup>3</sup>. The spike proteins  
137 from these sarbecoviruses were successfully incorporated into the VSV pseudotypes at comparable  
138 levels (Fig. 1l). In addition, a well-established RBD-hFc-based assay was also employed to assess the  
139 live cell virus-receptor binding (Extended Data Fig. 3d-f). The two different functional assays provide  
140 cross-validation and, to an extent, exclude the potential impact of other spike components on viral  
141 entry, such as NTD and S2.

142

### 143 **Multi-species ACE2 usage profile**

144 To illustrate a comprehensive ACE2 usage spectrum of each sarbecovirus, we examined 56 ACE2  
145 orthologues from 51 bats and 5 representative non-bat mammals. The bat species represent a broad  
146 genetic diversity spanning 11 bat families with global distribution, including eight rhinolophus bats  
147 geographically across Europe, Africa, and Asia (Fig 2a, and Extended Data Fig. 4)<sup>30</sup>. Sequence analysis  
148 of these ACE2 orthologues exhibited great diversity in residues potentially involved in sarbecovirus  
149 interactions (Extended Data Fig.5a-b). HEK293T cells stably expressing ACE2 orthologues were

150 established and maintained with verified expression<sup>30</sup> (Extended Data Fig. 6). RBD binding and  
151 pseudovirus entry assays were conducted to evaluate the multi-species ACE2 usage of 14  
152 sarbecoviruses with distinct RBM features (Fig. 2a-b).

153 These two assays displayed generally consistent ACE2 usage patterns, with a few exceptions.  
154 Except for the type-IV RBM sarbecoviruses, the other ten sarbecoviruses displayed ACE2 usage with  
155 different tropisms. Type-I RBM viruses, like SARS-CoV-1, SARS-CoV-2, and GX-P2V, efficiently  
156 use most orthologues, including human ACE2 (hACE2) (Fig. 2a). Comparatively, RBM type-II or type-  
157 III sarbecoviruses generally showed narrower ACE2 tropism, and most are unable to use hACE2. The  
158 geographical distributions of rhinolophus bat species with ACE2 supporting the entry of indicated  
159 sarbecoviruses are analyzed (Extended Data Fig. 7a). Although PRD-0038 has been proposed as a  
160 sarbecovirus with broad ACE2 usage<sup>42</sup>, this virus and three other clade 3 sarbecoviruses display a  
161 moderate breadth in our study (Extended Data Fig. 7b). The RBD binding of the five sarbecoviruses  
162 with their optimal ACE2 orthologues, most are from their hosts, was further demonstrated through  
163 flow cytometry and Bio-layer interferometry (BLI) (Fig. 2c-d).

164 Notably, two close-related RBM type-I sarbecoviruses, GX-P2V and RaTG13, displayed  
165 contrasting ranges of ACE2 tropism (Fig. 2a, b). Pseudovirus entry and RBD binding data based on  
166 swap mutants between the four residues on positions 493, 498, 501, and 505 (SARS-CoV-2 numbering)  
167 highlighted the critical role of position 501 residues in determining the breadth of ACE2 tropism (Fig.  
168 2e-h, Extended Data Fig. 8a)<sup>1,33,46,47</sup>. Residue usage analysis of the six ACE2 positions (38, 41, 42,  
169 353, 354, and 355) that are spatially close to position 501 (SARS-CoV-2 numbering) underscore an  
170 overall negatively charged surface among the 56 orthologues, thereby disfavoring D501 due to  
171 electrostatic repulsion (Fig. 2i). This hypothesis is further confirmed by similar phenotype of SARS-  
172 CoV-1, SARS-CoV-2, and RshSTT200 carrying D/T mutations at the same position (Extended Data  
173 Fig. 8b-c and Extended Data Fig. 9a-d). Since N501Y became dominant during SARS-CoV-2  
174 spreading in humans, we also compared the multi-species ACE2 usage spectra of SARS-CoV-1 and  
175 SARS-CoV-2 carrying N or Y at position 501<sub>SARS-CoV-2</sub><sup>48</sup>. The result showed the Y mutation in this  
176 position resulted in reduced ACE2 tropism of SARS-CoV-1 but an expanded tropism in SARS-CoV-2  
177 (Extended Data Fig. 9a-d). Structural analysis shows Y487<sub>SARS-CoV-1</sub> may result in steric hindrance with  
178 local Y41<sub>hACE2</sub> and K353<sub>hACE2</sub>, whereas the Y501<sub>SARS-CoV-2</sub> instead forms a  $\pi$ - $\pi$  stacking interaction  
179 with Y41<sub>hACE2</sub>, highlighting a virus-specific influence (Extended Data Fig. 9e-f)<sup>49</sup>.

180 The different PSV entry efficiencies of SARS-CoV-2, SARS-CoV-2-N501Y, and SARS-CoV-2-  
181 Omicron BA.1 in using different ACE2 orthologues indicated the presence of other residues affecting  
182 the ACE2 tropism of Omicron BA.1 other than the 501 residues, which is further confirmed by the  
183 authentic SARS-CoV-2 infection assays (Fig. 2j and Extended Data Fig. 10a). Fine mapping of the  
184 mutations in BA.1 underscores the critical contribution of residues 493 in impacting multi-species  
185 ACE2 tropism (Fig. 2j-k, Extended Data Fig. 10b-f).

186 Collectively, these data indicated that the overall multi-species ACE2 adaptiveness and species-  
187 specific ACE2 usage are affected by the RBM indel types and critical RBM residue usage, particularly  
188 at positions 501<sub>SARS-CoV-2</sub> and 493<sub>SARS-CoV-2</sub>.

189

### 190 **The impact of RBM indels on ACE2 recognition**

191 To investigate the impact of loop deletions on multi-species ACE2 adaptiveness, we generated  
192 chimeras with specific loop substitutions in Region 1 and 2. These comprise SARS-CoV-2 with single  
193 deletions in either Region 1 or 2 and other sarbecoviruses carrying partial or entire loop substitutions  
194 with SARS-CoV-2 equivalent sequences (Fig. 3a). The cellular expression and VSV package  
195 efficiency of all spike chimeras were validated by Western blot (Fig. 3b).

196 SARS-CoV-2 with a Region 1 4aa KVNY deletion ( $\Delta$ Region1\*, relative to RshSTT200)  
197 displayed reduced multi-species ACE2 adaptiveness but still retained the capacity to use ACE2 from  
198 many species, including humans (Fig. 3c, d). However, the 9aa partial deletion in Region 2 ( $\Delta$ Region2\*,  
199 relative to Rc-o319) completely abolished its ability to use all tested ACE2 orthologues, including  
200 R.cor ACE2. For BM48-31 and Rc-o19, region substitution by SARS-CoV-2 counterparts slightly  
201 increases the number of supportive ACE2 orthologues, yet still unable to achieve a broad tropism as  
202 RBM type-I sarbecoviruses. Indeed, multi-species ACE2 tropism can be reduced if unfavorable  
203 residues are presented in the loops with complemented length, as observed in RshSTT200 and Rc-  
204 o319. Thus, entire region 1 substitution rather than just filling-up the gaps (mutants marked with \*) is  
205 sometimes necessary for maintaining or expanding multi-species ACE2 tropism, indicating the side  
206 chain of the loop is crucial in addition to the loop length (Fig. 3c, d). Notably, the highly conserved  
207 disulfide bridge is present in Rc-o319-R2 but not in Rc-o319-R2\*, and its importance was further  
208 verified by the loss of ability of SARS-CoV-2 and Rc-o319-R2 with a C480S mutation<sup>45,50</sup>. However,  
209 introducing a disulfide to Rc-o319-R2\* via K480C mutation remains insufficient to restore its ability

210 to use ACE2, suggesting the presence of incompatible residues for Region 2 ACE2 interaction (Fig3.  
211 e-h).

212 Unexpectedly, substituting both regions (R1+R2) in the three RBM type-IV (clade 2)  
213 sarbecoviruses (ZC45, RmYN02, HKU3) failed to recover any detectable ACE2 usage in both binding  
214 and entry assays (Fig3. c, d). These data indicate the presence of determinants other than loop deletions  
215 that restrict ACE2 usage in RBM type-IV sarbecoviruses<sup>3</sup>.

216

### 217 **Clade-specific residues restricting ACE2 usage**

218 We unexpectedly found that HKU3 and ZC45 remained unable to bind any ACE2 even with the  
219 entire RBM (aa439-508) replaced, indicating the presence of determinants restricting ACE2  
220 recognition outside the RBM region (Extended Data Fig.11a). When comparing RBD sequences from  
221 172 RBM type-IV (clade 2) sarbecoviruses with the other 96 ACE2-using sarbecoviruses,  
222 approximately twenty of clade 2 specific residues situated within or outside the RBMs were identified  
223 (Fig. 4a). It has been proposed that two residues (D496 and P502) within the Region 3 of RBM type-  
224 IV sarbecoviruses may restrict potential ACE2 interaction based on structural modeling, while the  
225 impact of this two residues, as well as other RBD residues, to ACE2 recognition remains to be  
226 investigated by cell-based functional assays<sup>51</sup>.

227 To identify the determinants restricting ACE2 recognition, we conducted RBM sequence swap  
228 analyses based on SARS-CoV-2 and HKU3, the sarbecoviruses showing the highest RBD protein  
229 identity (63.24%) in our study (Extended Data Fig. 2b). Sequence alignment of SARS-CoV-1, SARS-  
230 CoV-2 and HKU3 RBD displayed 16 HKU3-specific residues upstream of the RBM region (Fig. 4b).  
231 The dissection started from large fragment swaps and then proceeded to fine mapping of single  
232 residues (Fig. 4b, c). In addition to SARS-CoV-2 RBM (HKU3-RBM<sub>SARS2</sub>) replacement, further  
233 substituting fragment A (aa385-417) enabled HKU3 to use hACE2 for efficient entry but remained  
234 deficient in binding hACE2. Further extension by fragment B (aa354-417) and fragment C (aa349-  
235 417) underscore the critical contribution of S349<sub>SARS-CoV-2</sub> for efficient binding (Fig. 4d, e). Fine  
236 mapping of fragment A highlighted the crucial role of six residues in position 388, 394, 399, 401, 404,  
237 405 (SARS-CoV-2 numbering) that restricting hACE2 usage, all of which are clade-2 specific residues  
238 (Fig. 4c-e and Extended Data Fig.11b). The multi-species ACE2 usage spectra of HKU3-RBM<sub>SARS2</sub>  
239 carrying S+NNSVGD, S+VGD mutations were demonstrated with improved ACE2 adaptiveness



240 (Fig.4f, g). Similar results were obtained when testing another RBM type-IV sarbecovirus, ZC45  
241 (Extended Data Fig. 12).

242 The restrictive effect of these clade 2-specific residues was further demonstrated by the loss of  
243 ACE2 usage of SARS-CoV-2 mutants. SARS-CoV-2 carrying the corresponding mutants within or  
244 outside the RBM region (S349N, V401L, V401L+G404S+D405S, G496D+G502P, and  
245 P507A+Y508T) all displayed a significantly reduced efficiency in use hACE2 (Fig. 4h, i). Structural  
246 modeling by AlphaFold2 suggests that HKU3 RBD carrying increasing substitutions of SARS-CoV-2  
247 equivalent sequences resulted in a gradually decreased root mean square deviation (RMSD) when  
248 superimposing with SARS-CoV-2 RBD. The RMSD reduction is apparently due to the RBM  
249 conformational shift, indicating an RBM remodeling toward a structure more compatible with ACE2-  
250 binding (Fig. 4j).

251 Interestingly, the two clade-2 specific residues crucial for ACE2 binding, S349<sub>SARS-CoV-2</sub> and  
252 V401<sub>SARS-CoV-2</sub>, are situated underneath the canonical RBM region. V401L and S349N (SARS-CoV-2  
253 numbering) in HKU3 may interfere with the RBM conformation due to their relatively larger side  
254 chains (Fig. 4k). The resulting conformational shift may lead to the mismatch of critical residues for  
255 ACE2 interaction, thereby restricting ACE2 usage even with SARS-CoV-2 RBM sequences (Fig. 4l).  
256 Thus, it is very unlikely for so far identified clade 2 sarbecoviruses to gain ACE2 usage simply through  
257 RBM indels unless the entire RBD was substituted.

258

### 259 **Coevolution of RBM indels and ACE2 adaptiveness**

260 To trace the coevolution of sarbecoviruses RBM indels and ACE2 adaptation, the functional data  
261 based on multi-species ACE2 usage were integrated with analyses based on RBD clades, RBM types,  
262 and residue usages in the two featured regions (Fig. 5a-c and Extended Data Fig.13). The multi-species  
263 ACE2 adaptiveness and hACE2 usage reveal the overall spillover risks of sarbecoviruses from  
264 different clades and RBM indel types (Fig. 5a-b). The close scrutiny of the sequence features unveils  
265 an intriguing indel pattern in Region 1, characterized by one or two centrally located glycine (G), while  
266 the sequence features in Region 2 underscore the presence of a complex indel in this region rather than  
267 a straightforward 9aa or 13/14 deletion in RBM type III and IV sarbecoviruses, respectively (Fig. 5c  
268 and Extended Data Fig.13). Notably, a potential evolutionary trace of Region 1 insertion was identified  
269 by the likely duplication of NY/NF sequences on the right side of the G. These analyses provide

270 valuable insights for deciphering the evolutionary trajectories of various sarbecoviruses.

271 Combining this information, we proposed an evolutionary pathway delineating the emergence of  
272 various RBM types, highlighted by critical events driving the evolution ([Figure 5d](#)). While the origin  
273 of the common ancestor of sarbecoviruses remains elusive, Africa/Europe sarbecoviruses (Clade 3)  
274 maintained a relatively ancient state of RBM indel type-II. The Asia sarbecoviruses underwent  
275 extensive evolution and developed into clade 1 and 2 sarbecoviruses with great genetic diversity. These  
276 viruses evolved in three different directions, each exhibiting distinct ACE2 adaptiveness. Clade 1c  
277 sarbecoviruses maintained RBM type-II with limited genetic diversities based on currently known  
278 sequences. Clade 2 sarbecoviruses underwent R1 (-5aa) and R2 (-13/14aa) indels and lost ACE2 usage,  
279 which is coupled with the emergence of clade 2-specific residues that further restricted ACE2 usage.  
280 On the other hand, clade 1a and 1b viruses underwent Region 1 insertion (or indels with increased  
281 residue numbers), generating the longest (8aa) Region 1 and superior multi-species ACE2 adaptiveness.  
282 Some Clade 1b viruses subsequently underwent further indels in Region 1 (-2-4aa) and Region 2 (-  
283 9aa), which turned into RBM type II (e.g. RshTT200 and GX-P1E) and type III (e.g. Rc-o319 and Rc-  
284 kw8), respectively ([Figure 5d](#)).

285 While Region 1 is shorter than Region 2, it displayed more dynamic sequence changes in ACE2  
286 using sarbecoviruses, fine-tuning the species-specific ACE2 adaptiveness. By contrast, no further  
287 RBM indel was observed in the 172 RBM type-IV (clade 2) sarbecoviruses, indicating that Region 1  
288 may no longer be a crucial determinant for the adaptation of their receptor that other than ACE2.  
289 Intriguingly, despite the high variability in Region 1 sequences, only two out of the 268 sequences,  
290 BM48-31 and BB9904, lack a G in this region. In RBM type I sarbecoviruses with 8aa length, most  
291 clade 1b viruses maintained a double G (2G), whereas most 1a viruses kept an SG or TG in the middle  
292 ([Figure 5c, e](#)).

293 From a structural aspect, indels in Region 1 resulted in different loop lengths, with a G close to  
294 the turn of the loop. Interestingly, the longer Region 1 loop allows a closer distance and potential H-  
295 bond formation with ACE2, reinforcing ACE2 interactions along with the Region 3 loop, highlighting  
296 the importance of Region 1 length and its residue usage in multi-species ACE2 adaptiveness ([Fig.5f](#)).

297 Our hypothesis is supported by the data showing a dramatic decrease of ACE2 fitness in SARS-  
298 CoV-2 carrying a G447Y mutation ([Fig.5g and Extended Data Fig.14](#)). Additionally, we observed a  
299 reduced multi-species ACE2 adaptiveness of the “G-free” 4aa deletion mutant, SARS-CoV-2-ΔGGNY

300 (Region 1: DSKVNY), compared to SARS-CoV-2-ΔKVNY (Region 1: DSGGNY) (as shown in  
301 Figure 3), the former only recognize R.alc ACE2, similar to the phenotype of BM48-31 which also  
302 lacks G in region 1 ([Fig.5g and Extended Data Fig.14](#)). SARS-CoV-2-ΔGGNY may employ a similar  
303 ACE2 recognition mode as BM48-31, considering the importance of position 31<sub>R.alc ACE2</sub> for both  
304 viruses in a swap mutagenesis experiment based on R.alc ACE2 and its closest orthologue, R.fer ACE2  
305 ([Extended Data Fig. 15](#)).

306

## 307 **Discussion**

308 The long-term and constant evolution of sarbecoviruses in rhinolophus bats drives the emergence  
309 of sarbecovirus clades with diversified RBM sequences. The frequent sequence changes, particularly  
310 indels, within the RBM pose challenges in predicting the potential of sarbecoviruses to cross species  
311 barriers and spill over to humans. To more precisely investigate the influence of indels and other critical  
312 residues on multi-species ACE2 usage, we propose a novel RBM indel-based classification,  
313 categorizing all currently identified sarbecoviruses into four distinct RBM indel types.

314 Our functional data, combined with extensive sequence analyses, led to a detailed summary of  
315 the ACE2 usage adaptiveness of sarbecoviruses within specific clades and RBM indel types ([Extended](#)  
316 [Data Fig.16, Graphic Abstract](#)). Despite with narrower ACE2 tropism, all tested sarbecoviruses  
317 carrying single deletions exhibited confirmed ACE2 usage, typically adapting well to ACE2 from their  
318 hosts. Furthermore, we proposed a hypothesis outlining the evolutionary history of sarbecoviruses  
319 exhibiting distinct RBM indel types. Since the number of sarbecovirus sequences from different clades  
320 is constantly increasing, the more intricate evolutionary history of sarbecoviruses remains to be  
321 updated or amended.

322 The driving force for the emergence of different sarbecovirus Region 1 and Region 2 indels  
323 remains elusive. Virus recombination may play a crucial role, considering that the RBM or even  
324 Region 1 has been predicted as a breaking point for combinations between sarbecoviruses<sup>35</sup>.  
325 Additionally, although various NTD-indels emerged in SARS-CoV-2 during the pandemic, so far, no  
326 indels have been detected in RBM Region 1 or Region 2, suggesting a different evolution mechanism  
327 of RBM indels formation of various sarbecoviruses in bats compared with that of SARS-CoV-2 in  
328 humans<sup>52</sup>.

329 Our results reveal a coevolution between sarbecovirus indels and multi-species ACE2

330 adaptiveness. Remarkably, the fine-tuning of RBM Region 1 through various indels and specific side  
331 chains promotes the emergence of various sarbecoviruses with distinct multi-species ACE2 usage  
332 spectra. This could be attributed to the dispensable nature of Region 1 for interaction with a specific  
333 ACE2 orthologue due to the compensation of the Region 3 loop without indels, while additional  
334 interactions mediated by the extended Region 1 loop in RBM type-I sarbecoviruses might be crucial  
335 for achieving better multi-species ACE2 adaptiveness to facilitate host jumping. Interestingly, a  
336 conserved G within Region 1 suggests that better flexibility or the absence of a large side-chain in this  
337 region may confer some evolutionary advantage. Comparatively, indels in Region 2 are less diversified  
338 than in Region 1 and generally have a more dramatic impact on ACE2 recognition than deletion in  
339 Region 1, or even result in the switch of ACE2 usage to another yet-unknown receptor. Notably, the  
340 deficiency in multi-species ACE2 adaptiveness does not mean a lack of ability to use hACE2, as is  
341 exemplified in Khosta-2 or other Clade 3 sarbecoviruses mutants<sup>1,42-44</sup>.

342 Filling RBM deletions with SARS-CoV-2 counterparts does not guarantee a broader ACE2 usage  
343 spectrum, sometimes instead resulting in reduced or lost ACE2 usage. This underscores the enhanced  
344 ACE2 adaptiveness achieved during adaptive evolution, with both length and residues being optimized  
345 in specific indels. Consequently, substituting the entire loop sometimes is necessary for achieving  
346 higher ACE2 compatibility. However, RBM type-IV sarbecoviruses, even after gap-filling or entire  
347 RBM substitution, remained unable to use any ACE2 orthologues, which led to the identification of  
348 clade-specific determinants outside the RBM that restrict ACE2 usage, probably a consequence of  
349 adaptation to another receptor usage. Interestingly, some critical RBD core residues are underneath the  
350 RBM, indirectly restricting ACE2 binding by affecting the RBM conformation. Future structural  
351 analysis could shed light on the molecular details of how these determinants affect receptor recognition.

352 It should be noted that although ACE2 fitness serves as the primary barrier for sarbecoviruses to  
353 cross species, ACE2 compatibility alone does not guarantee susceptibility at the animal level. Other  
354 factors, such as host protease, immune response, and viral replication efficiency, also affect host  
355 tropism, which can be verified by authentic viruses and in vivo studies in the future<sup>11,53,54</sup>.

356 In conclusion, our RBM indel type classification offers a more precise way to describe  
357 sarbecoviruses when integrated with RBD phylogenetic information. Our functional ACE2 usage data  
358 elucidate the underlying mechanism governing multi-species ACE2 usage and adaptiveness, shaped  
359 by multiple factors such as the presence and features of RBM loop deletions, RBM disulfide bridges,

360 critical RBM residues for direct interaction, and ACE2 usage restricting residues within and outside  
361 the RBM. These findings establish a solid scientific foundation for risk assessment and viral  
362 surveillance to mitigate potential future zoonoses caused by these viruses.

363

#### 364 **Author contributions**

365 Conceptualization, H.Y., and J.Y.S; methodology, J.Y.S, Y.M.C, M.X.G, Y.H.S, C.L.W, C.L, C.B.M, P.  
366 L, Q.X, L.L.S, F.T, M.L.H, X.Y, X.Y, Z.X.M, Y.C.S; data analysis, J.Y.S, Y.M.C, M.X.G, Y.H.S;  
367 writing—original draft, H.Y., J.Y.S, Y.M.C; writing—review & editing, H.Y., J.Y.S, Z.L.S.;  
368 supervision and funding acquisition, H.Y..

369

#### 370 **Acknowledgments**

371 We are grateful to the funding support from National Key R&D Program of China  
372 (2023YFC2605500 to H.Y.), National Natural Science Foundation of China (NSFC) projects  
373 (82322041, 32270164, 32070160 to H.Y.), Fundamental Research Funds for the Central Universities  
374 (2042023kf0191, 2042022kf1188 to H.Y.), and Natural Science Foundation of Hubei Province  
375 (2023AFA015 to H.Y.). We thank Huabin Zhao (Wuhan University) for his help in providing the  
376 coding sequences of many bat ACE2 orthologues. We thank Ming Guo (Wuhan University) for his  
377 help in conducting SARS-CoV-2 authentic viruses related experiments in ABSL-3. We thank Qiang  
378 Ding (Tsinghua University) for his kind offer of several plasmids expressing mammalian ACE2  
379 orthologues. We also want to express our gratitude to the core facilities and ABSL-3 laboratory of the  
380 Key Laboratory of Virology, Wuhan University.

381

#### 382 **Data and code availability**

383 This study did not generate custom computer code.

384 Any additional information required to reanalyze the data reported in this paper is available from the  
385 lead contact upon request.

386

#### 387 **Declaration of interests**

388 The authors declare no competing interests.

389

## 390 **RESOURCE AVAILABILITY**

### 391 **Lead contact**

392 Further information and requests for resources and reagents should be directed to and will be fulfilled  
393 by the lead contact, Huan Yan (huanyan@whu.edu.cn)

### 394 **Materials availability**

395 All reagents generated in this study are available from the lead contact with a completed Materials  
396 Transfer Agreement.

397

398

399

## 400 **References**

- 401 1. Starr, T. N. *et al.* ACE2 binding is an ancestral and evolvable trait of sarbecoviruses. *Nature* **603**, 913–918 (2022).
- 402 2. Hu, B. *et al.* Discovery of a rich gene pool of bat SARS-related coronaviruses provides new insights into the  
403 origin of SARS coronavirus. *PLoS Pathog.* **13**, e1006698 (2017).
- 404 3. Letko, M., Marzi, A. & Munster, V. Functional assessment of cell entry and receptor usage for SARS-CoV-2  
405 and other lineage B betacoronaviruses. *Nat. Microbiol.* **5**, 562–569 (2020).
- 406 4. Murakami, S. *et al.* Isolation of Bat Sarbecoviruses, Japan. *Emerg. Infect. Dis.* **28**, 2500–2503 (2022).
- 407 5. Guo, H. *et al.* Identification of a novel lineage bat SARS-related coronaviruses that use bat ACE2 receptor.  
408 *Emerg. Microbes Infect.* **10**, 1507–1514 (2021).
- 409 6. Zhou, H. *et al.* Identification of novel bat coronaviruses sheds light on the evolutionary origins of SARS-CoV-  
410 2 and related viruses. *Cell* **184**, 4380–4391.e14 (2021).
- 411 7. Wacharapluesadee, S. *et al.* Evidence for SARS-CoV-2 related coronaviruses circulating in bats and pangolins  
412 in Southeast Asia. *Nat. Commun.* **12**, 972 (2021).
- 413 8. Alkhovsky, S. *et al.* SARS-like Coronaviruses in Horseshoe Bats (*Rhinolophus* spp.) in Russia, 2020. *Viruses*  
414 **14**, 113 (2022).
- 415 9. Lam, T. T.-Y. *et al.* Identifying SARS-CoV-2-related coronaviruses in Malayan pangolins. *Nature* **583**, 282–285  
416 (2020).
- 417 10. Delaune, D. *et al.* A novel SARS-CoV-2 related coronavirus in bats from Cambodia. *Nat. Commun.* **12**, 6563  
418 (2021).
- 419 11. Guo, H. *et al.* ACE2-Independent Bat Sarbecovirus Entry and Replication in Human and Bat Cells. *mBio* **13**,  
420 e0256622 (2022).
- 421 12. Ksiazek, T. G. *et al.* A novel coronavirus associated with severe acute respiratory syndrome. *N. Engl. J. Med.*  
422 **348**, 1953–1966 (2003).
- 423 13. Zhou, P. *et al.* A pneumonia outbreak associated with a new coronavirus of probable bat origin. *Nature* **579**,  
424 270–273 (2020).
- 425 14. Meta Djoms, D. *et al.* Coronaviruses Are Abundant and Genetically Diverse in West and Central African Bats,  
426 including Viruses Closely Related to Human Coronaviruses. *Viruses* **15**, 337 (2023).
- 427 15. Murakami, S. *et al.* Detection and Characterization of Bat Sarbecovirus Phylogenetically Related to SARS-CoV-  
428 2, Japan. *Emerg. Infect. Dis.* **26**, 3025–3029 (2020).

- 429 16. Temmam, S. *et al.* Bat coronaviruses related to SARS-CoV-2 and infectious for human cells. *Nature* **604**, 330–  
430 336 (2022).
- 431 17. Ge, X.-Y. *et al.* Isolation and characterization of a bat SARS-like coronavirus that uses the ACE2 receptor.  
432 *Nature* **503**, 535–538 (2013).
- 433 18. Li, W. *et al.* Bats are natural reservoirs of SARS-like coronaviruses. *Science* **310**, 676–679 (2005).
- 434 19. Wu, Z. *et al.* A comprehensive survey of bat sarbecoviruses across China in relation to the origins of SARS-  
435 CoV and SARS-CoV-2. *Natl. Sci. Rev.* **10**, nwac213 (2023).
- 436 20. Xiao, K. *et al.* Isolation of SARS-CoV-2-related coronavirus from Malayan pangolins. *Nature* **583**, 286–289  
437 (2020).
- 438 21. Guo, Z. *et al.* SARS-CoV-2-related pangolin coronavirus exhibits similar infection characteristics to SARS-  
439 CoV-2 and direct contact transmissibility in hamsters. *iScience* **25**, 104350 (2022).
- 440 22. Niu, S. *et al.* Molecular basis of cross-species ACE2 interactions with SARS-CoV-2-like viruses of pangolin  
441 origin. *EMBO J.* **40**, (2021).
- 442 23. Li, P. *et al.* The *Rhinolophus affinis* bat ACE2 and multiple animal orthologs are functional receptors for bat  
443 coronavirus RaTG13 and SARS-CoV-2. *Sci. Bull.* **66**, 1215–1227 (2021).
- 444 24. Liu, K. *et al.* Binding and molecular basis of the bat coronavirus RaTG13 virus to ACE2 in humans and other  
445 species. *Cell* **184**, 3438-3451.e10 (2021).
- 446 25. Boni, M. F. *et al.* Evolutionary origins of the SARS-CoV-2 sarbecovirus lineage responsible for the COVID-19  
447 pandemic. *Nat. Microbiol.* **5**, 1408–1417 (2020).
- 448 26. Hofmann, H. *et al.* Human coronavirus NL63 employs the severe acute respiratory syndrome coronavirus  
449 receptor for cellular entry. *Proc. Natl. Acad. Sci.* **102**, 7988–7993 (2005).
- 450 27. Xiong, Q. *et al.* Close relatives of MERS-CoV in bats use ACE2 as their functional receptors. *Nature* **612**, 748–  
451 757 (2022).
- 452 28. Lan, J. *et al.* Structure of the SARS-CoV-2 spike receptor-binding domain bound to the ACE2 receptor. *Nature*  
453 **581**, 215–220 (2020).
- 454 29. Wu, K., Peng, G., Wilken, M., Geraghty, R. J. & Li, F. Mechanisms of Host Receptor Adaptation by Severe  
455 Acute Respiratory Syndrome Coronavirus. *J. Biol. Chem.* **287**, 8904 (2012).
- 456 30. Yan, H. *et al.* ACE2 receptor usage reveals variation in susceptibility to SARS-CoV and SARS-CoV-2 infection  
457 among bat species. *Nat. Ecol. Evol.* **5**, 600–608 (2021).
- 458 31. Liu, Y. *et al.* Functional and genetic analysis of viral receptor ACE2 orthologs reveals a broad potential host  
459 range of SARS-CoV-2. *Proc. Natl. Acad. Sci.* **118**, e2025373118 (2021).
- 460 32. Zhang, Y. *et al.* Cross-species tropism and antigenic landscapes of circulating SARS-CoV-2 variants. *Cell Rep.*  
461 **38**, 110558 (2022).
- 462 33. Li, P. *et al.* Effect of polymorphism in *Rhinolophus affinis* ACE2 on entry of SARS-CoV-2 related bat  
463 coronaviruses. *PLOS Pathog.* **19**, e1011116 (2023).
- 464 34. Guo, H. *et al.* Evolutionary Arms Race between Virus and Host Drives Genetic Diversity in Bat Severe Acute  
465 Respiratory Syndrome-Related Coronavirus Spike Genes. *J. Virol.* **94**, e00902-20 (2020).
- 466 35. Wells, H. L. *et al.* The evolutionary history of ACE2 usage within the coronavirus subgenus *Sarbecovirus*. *Virus*  
467 *Evol.* **7**, veab007 (2021).
- 468 36. Roelle, S. M., Shukla, N., Pham, A. T., Bruchez, A. M. & Matreyek, K. A. Expanded ACE2 dependencies of  
469 diverse SARS-like coronavirus receptor binding domains. *PLOS Biol.* **20**, e3001738 (2022).
- 470 37. Hu, D. *et al.* Genomic characterization and infectivity of a novel SARS-like coronavirus in Chinese bats. *Emerg.*  
471 *Microbes Infect.* **7**, 154 (2018).
- 472 38. Ren, W. *et al.* Difference in receptor usage between severe acute respiratory syndrome (SARS) coronavirus and

- 473 SARS-like coronavirus of bat origin. *J. Virol.* **82**, 1899–1907 (2008).
- 474 39. Crook, J. M. *et al.* Metagenomic identification of a new sarbecovirus from horseshoe bats in Europe. *Sci. Rep.*  
475 **11**, 14723 (2021).
- 476 40. Drexler, J. F. *et al.* Genomic characterization of severe acute respiratory syndrome-related coronavirus in  
477 European bats and classification of coronaviruses based on partial RNA-dependent RNA polymerase gene sequences.  
478 *J. Virol.* **84**, 11336–11349 (2010).
- 479 41. Tao, Y. & Tong, S. Complete Genome Sequence of a Severe Acute Respiratory Syndrome-Related Coronavirus  
480 from Kenyan Bats. *Microbiol. Resour. Announc.* **8**, e00548-19 (2019).
- 481 42. Lee, J. *et al.* Broad receptor tropism and immunogenicity of a clade 3 sarbecovirus. *Cell Host Microbe* **31**, 1961-  
482 1973.e11 (2023).
- 483 43. Seifert, S. N. *et al.* An ACE2-dependent Sarbecovirus in Russian bats is resistant to SARS-CoV-2 vaccines.  
484 *PLOS Pathog.* **18**, e1010828 (2022).
- 485 44. Zech, F. *et al.* Spike residue 403 affects binding of coronavirus spikes to human ACE2. *Nat. Commun.* **12**, 6855  
486 (2021).
- 487 45. Grishin, A. M. *et al.* Disulfide Bonds Play a Critical Role in the Structure and Function of the Receptor-binding  
488 Domain of the SARS-CoV-2 Spike Antigen. *J. Mol. Biol.* **434**, 167357 (2022).
- 489 46. Wang, Q. *et al.* Key mutations on spike protein altering ACE2 receptor utilization and potentially expanding  
490 host range of emerging SARS-CoV-2 variants. *J. Med. Virol.* **95**, e28116 (2023).
- 491 47. Zhao, Z. *et al.* Structural basis for receptor binding and broader interspecies receptor recognition of currently  
492 circulating Omicron sub-variants. *Nat. Commun.* **14**, 4405 (2023).
- 493 48. Starr, T. N. *et al.* Shifting mutational constraints in the SARS-CoV-2 receptor-binding domain during viral  
494 evolution. *Science* **377**, 420–424 (2022).
- 495 49. Han, P. *et al.* Molecular insights into receptor binding of recent emerging SARS-CoV-2 variants. *Nat. Commun.*  
496 **12**, 6103 (2021).
- 497 50. Hati, S. & Bhattacharyya, S. Impact of Thiol–Disulfide Balance on the Binding of Covid-19 Spike Protein with  
498 Angiotensin-Converting Enzyme 2 Receptor. *ACS Omega* **5**, 16292–16298 (2020).
- 499 51. Gao, B. & Zhu, S. Mutation-driven parallel evolution in emergence of ACE2-utilizing sarbecoviruses. *Front.*  
500 *Microbiol.* **14**, 1118025 (2023).
- 501 52. Mykytyn, A. Z., Fouchier, R. A. & Haagmans, B. L. Antigenic evolution of SARS coronavirus 2. *Curr. Opin.*  
502 *Virol.* **62**, 101349 (2023).
- 503 53. Menachery, V. D. *et al.* Trypsin Treatment Unlocks Barrier for Zoonotic Bat Coronavirus Infection. *J. Virol.* **94**,  
504 e01774-19 (2020).
- 505 54. Richard, M. *et al.* Factors determining human-to-human transmissibility of zoonotic pathogens via contact. *Curr.*  
506 *Opin. Virol.* **22**, 7–12 (2017).
- 507
- 508

## 509 **Materials and Methods**

510

511 **Cell culture.** HEK293T cells (ATCC, CRL-1586) and their derivatives were maintained in Dulbecco's modified eagle  
512 medium (DMEM; Gibco) supplemented with 10% fetal bovine serum (FBS), 2.0mM L-Glutamine, 110 mg/L sodium  
513 pyruvate, and 4.5 g/L D-glucose. II-Hybridoma (CRL-2700), secreting a monoclonal antibody targeting VSV  
514 glycoprotein (VSV-G), was maintained in Minimum Essential Medium with Earle's salts and 2.0 mM L-Glutamine  
515 (MEM; Gibco). All cells were cultured at 37°C in 5% CO<sub>2</sub> with regular passage every 2-3 days.

516



517 **Gene sequences.** Sarbecovirus spike sequences are retrieved from NCBI Virus and GISAID databases. The keywords  
518 used for search include "Betacoronavirus," "Sequence length between 1000-1400" "protein" and "NOT Homo  
519 sapiens" for NCBI and "bat," "pangolin," "civet," coronaviruses for GISAID. A comprehensive collection of 2318  
520 Betacoronavirus spike protein sequences was obtained. After extracting 876 sarbecovirus sequences through  
521 phylogenetic analysis using Geneious, the dataset was refined to 268 unique sequences for further analysis by  
522 excluding redundant entries. The ACE2 orthologues sequences were summarized by previous reports<sup>30</sup>. Several  
523 additional ACE2 orthologues tested in this study include *Rhinolophine Malayanus* (Provided by Professor Huanbin  
524 Zhao, Wuhan University, China), *Rhinolophus shameli* (GenBank: MZ851782), *Rhinolophus cornutus* (GenBank:  
525 BCG67443.1), *Rhinolophus sinicus isolate Rs-3357*(GenBank: KC881004.1), *Rhinolophus affinis* (GenBank:  
526 QMQ39227.1), *Manis javanica (Pangolin)*(GenBank: XP\_017505752.1), *Mouse* (GenBank: NP\_001123985),  
527 *Camelus* (GenBank: XP\_006194263), *Civet* (Protein: Q56NL1), *Rhinolophus alcyone* (Protein: ALJ94035.1).  
528 Human Aminopeptidase N precursor (APN) (Protein: NP\_001141.2) was included as a negative control. The sources  
529 and accession numbers of the receptors and the 268 sarbecovirus were summarized in **Supplementary data S1**.

530

531 **Bioinformatic analysis.** Amino acid or nucleotide sequences from viruses or ACE2 orthologues were aligned using  
532 Mafft v7.450<sup>55</sup>. Phylogenetic trees were generated with IQ-Tree (version 2.0.6)<sup>56</sup> using a Maximum Likelihood model  
533 with 1000 bootstrap replicates. Tree annotations were performed using iTOL (<https://itol.embl.de/>). Sequence  
534 identities were analyzed by Geneious prism (<https://www.geneious.com/>) after aligned by Mafft. The residue usage  
535 frequency (Sequence Logo analysis) was generated by the Geneious Prime.

536

537 **Plasmids.** The coding sequences of various coronavirus spikes and their derivatives were human codon optimized  
538 and cloned into the pCAGGS vector with a C-terminal 18-amino acids replaced with an HA tag (YPYDVDPDYA) for  
539 improving VSV pseudotyping efficiency and enabling detection<sup>57,58</sup>. The plasmids for expressing ACE2 orthologues  
540 are constructed by inserting human codon-optimized ACE2 sequences into a lentiviral transfer vector (pLVX-IRES-  
541 puro) with a C-terminal 3×FLAG-tag (DYKDHD-G-DYKDHD-I-DYKDDDDK) for detection. The plasmids  
542 expressing the recombinant coronaviruses RBD human IgG Fc (RBD-hFc) fusion proteins were constructed by  
543 inserting RBD sequences corresponding to SARS-CoV-2 (aa331-524) containing an N-terminal CD5 secretion signal  
544 peptide (MPMGS LQPLATLYLLGMLVASVL) and a C-terminal hFc-twin-strep tandem tags for purification and  
545 detection.

546

547 **ACE2 stable expression cell lines.** ACE2 stable expression cell lines were established as previously reported<sup>30,59</sup>.  
548 Briefly, lentivirus carrying the ACE2 genes was generated by co-transfecting pLVX-IRES-puro-ACE2 orthologues,  
549 pMD2G (plasmid no. 12259; Addgene), and psPAX2 (plasmid no. 12260; Addgene) into HEK293T cells. HEK293T  
550 cells were subsequent transduced with the lentiviruses, and the stable cells expressing ACE2 orthologues were  
551 selected in the presence of puromycin (1 µg/ml). The expression levels of ACE2 orthologues were assessed using an  
552 immunofluorescence assay as previously reported<sup>30</sup>. Briefly, HEK293T cells were fixed with 4% paraformaldehyde  
553 for 10 min at room temperature, permeabilized with 0.2% Triton X-100/PBS for 10 min, and blocked with 1% BSA  
554 for 30 min at 37 °C. Subsequently, the cells were incubated with M2 antibody (anti-FLAG-tag, catalogue no. F1804A-  
555 5MG; Sigma) at 4 °C for 1 hour. After three washes with PBS, the cells were treated with 2 µg/ml Alexa Fluor 594-  
556 conjugated goat anti-rabbit IgG (catalogue no. A11032; Thermo Fisher Scientific). Nucleus were stained blue with  
557 Hoechst 33342 (1:5,000 dilution in PBS). Images were captured with a fluorescence microscope (MI52-N; Mshot).  
558 Relative fluorescence unit of Alexa Fluor 596 and Hoechst 33342 was quantified by Thermo Varioskan LUX. The  
559 expression of most ACE2 orthologues were also verified by Western Blot analysis in our previous reports<sup>30</sup>.

560

561 **Recombinant protein expression and purification.** Recombinant RBD-hFc fusion proteins or ACE2 ectodomains  
562 (amino acid sequences 18-740 correspond to Human ACE2) fused with FLAG-strep-tag proteins were generated  
563 through transient transfection of HEK293T cells using Lipofectamine 2000. The transfected cells were cultured in  
564 SMM 293-TIS Expression Medium (Serum-free, without L-Glutamine) (Sino Biological). The supernatant,  
565 containing the recombinant proteins, was collected at 2, 4, and 6 days post-transfection, and the expression was  
566 confirmed through Western Blot analysis using the Goat Anti-Human IgG-Fc secondary Antibody (HRP)  
567 (SinoBiological Inc, SSA002) for RBD or the M2 antibody for ACE2. Protein purification was performed using  
568 Protein A/G Plus Agarose (Thermo Fisher Scientific) for RBD and Strep-Tactin®XT 4Flow® high capacity resin  
569 (IBA) for ACE2 ectodomains. The protein concentration was quantified using the BCA protein determination kit  
570 (EpiZyme) and SDS-PAGE with Coomassie blue staining was employed for analysis.

571  
572 **Live cell RBD binding assay.** HEK293T cells stably expressing ACE2 were seeded in poly-D-lysine-treated 96-well  
573 plates. After 12 hours, with cells were incubated with RBD-hFc protein (4 µg/ml) in growth medium for 0.5 hours at  
574 4 °C. Subsequently cells were washed with DMEM twice, and then treated with Alexa Fluor 488-conjugated goat  
575 anti-human IgG (catalogue no. A11013; Thermo Fisher Scientific) at a concentration of 2 µg/ml in DMEM with 2%  
576 FBS for 30 minutes (min) at 4 °C. Hoechst 33342 (1:5,000 dilution in PBS) was utilized for nuclear staining.  
577 Following fixation with methanol, images were captured by fluorescence microscopy (MI52-N; Mshot), and the  
578 fluorescence intensity was analyzed using Thermo Varioskan LUX Alexa

579  
580 **Flow cytometry.** HEK293T cells stably expressing ACE2 orthologues (*R.aff*, *R.sha*, *R.alc*, *R.mal*, and *R.cor*) were  
581 cultured in 6-well plates for 12 hours. Cells were detached by 5mM EDTA and washed twice by PBS, and then  
582 incubated with indicated proteins (RaTG13 RBD, RshSTT200 RBD, BM48-31 WT RBD, BM48-31 A480Y RBD,  
583 RmYN05 RBD, Rc-o319 RBD with hFc tag) at a concentration of 20 µg/ml for 30 min at 4°C. Following three PBS  
584 washes, cells were stained with 488-conjugated goat anti-human IgG (1:1000, Alexa Fluor) for 30 min. Subsequently,  
585 flow cytometry analysis was performed using a CytoFLEX analyzer, collecting 10,000 events per sample. In a  
586 separate assay demonstrating the sensitivity of live cell binding assay, HEK293T cells expressing hACE2 were plated  
587 12 hours before incubation with two-fold serial diluted SARS-CoV-2 RBD-hFc (from 20 µg/ml) for 30 min. After  
588 three PBS washes, cells were stained with 488-conjugated goat anti-human IgG (1:1000, Alexa Fluor) and subjected  
589 to Flow cytometry analysis. For the pseudoviruses entry assays, GFP expressing VSV pseudotypes was 10-fold serial  
590 diluted from  $1 \times 10^6$  TCID<sub>50</sub>/ml. After 12 hours post infection incubation, cells were washed with PBS and trypsinized  
591 for analysis. FlowJo V10 software was employed for data analysis.

592  
593 **Biolayer interferometry.** The Octet RED96 system (ForteBio, Menlo Park, CA) was employed to determine the  
594 apparent affinity (K<sub>d</sub>, app, due to the potential dimerization or ACE2) between the RBD and ACE2. The buffer for  
595 analysis was phosphate buffer saline with 0.05% Tween20 (PBST). The RBD (10 µg/ml) was captured on ProA  
596 biosensors, followed by binding of ACE2 ectodomains at 2-fold serial dilutions ranging from 500 nM for 120s,  
597 followed by dissociated in the PBST for additional 300s. Kinetics was modeled in a 1:1 using ForteBio Octet analysis  
598 software v12.2.0.20 (ForteBio, Menlo Park, CA). Mean KD values were derived by averaging all binding curves that  
599 conformed to the theoretical fit with an R<sup>2</sup> value ≥ 0.95.

600  
601 **Pseudovirus production and entry assays.** Pseudovirus incorporating coronaviruses spike proteins were produced  
602 using a vesicular stomatitis virus (VSV)-based system with slight modifications to a well-established protocol<sup>57,60,61</sup>.  
603 In general, HEK293T cells were transfected with plasmids expressing S proteins through Lipofectamine 2000  
604 (Biosharp, China). After 24 hours, the transfected cells were infected with VSV-dG-EGFP-FLuc ( $1 \times 10^6$  TCID<sub>50</sub>/ml)

605 diluted in DMEM followed a two-hour incubation on a shaker at 37 °C, the cells were replenished with DMEM  
606 containing anti-VSV-G monoclonal antibody (I1, 1 µg/ml). After 24 hours, the pseudovirus-containing supernatant  
607 was harvested, clarified at 12,000 revolutions per minute (rpm) for 5 min at 4 °C, and stored at -80 °C. For the viral  
608 entry assay, the HEK293T cell lines expressing various ACE2 orthologues were inoculated with pseudotyped viruses  
609 in DMEM with 10% FBS. In general,  $3 \times 10^4$  trypsinized cells were incubated with pseudovirus ( $1.5 \times 10^5$  TCID<sub>50</sub>/100  
610 µL) in a 96-well plate to allow cell attachment and pseudovirus entry. At 16-20 hpi, images of the infected cells were  
611 captured by a fluorescence microscope (MI52-N; Mshot). Intracellular luciferase activity was determined using a  
612 Bright-Glo Luciferase Assay Kit (Promega Corporation, E2620) and measured with a Thermo Varioskan LUX,  
613 SpectraMax iD3 Multi-well Luminometer (Molecular Devices) or a GloMax 20/20 Luminometer (Promega  
614 Corporation).

615  
616 **Authentic virus infection.** The SARS-CoV-2 WT strain (IVCAS 6.7512) was provided by the National Virus  
617 Resource, Wuhan Institute of Virology, Chinese Academy of Sciences. The BA.1 strain (YJ20220223) was provided  
618 by Hubei Provincial Center for Disease Control and Prevention. SARS-CoV-2 authentic viruses related experiments  
619 were conducted in ABSL-3 facility at Wuhan University with the approval from the Biosafety Committee of ABSL-  
620 3 lab. HEK293T cells expressing ACE2 orthologues were seeded in poly-lysine-treated 96-well plates ( $1.25 \times 10^5$   
621 cells/well). After a 12 hours incubation period, SARS-CoV-2 strains (WT and Omicron BA.1) were introduced to  
622 different stable cells and incubated for 1-2 hours. Following a medium change to DMEM with 2% FBS, cells were  
623 cultured for 24 hours, fixed with methanol, and treated with anti-SARS-CoV-2 Nucleocapsid (N) antibody (catalogue  
624 no. 40143-MM05; Sino Biological) at 1:1000 for one hour at 37 °C. After PBS wash, cells were treated with  
625 secondary antibody (Alexa Fluor 594) and Hoechst 33342 (1:10,000 dilution in PBS) for nuclei staining. Images  
626 were captured using a fluorescence microscope (MI52-N, Mshot, China).

627  
628 **Structural analysis.** Protein structures and complex were predicted by predicted by AlphaFold2 and HDOCK<sup>62-64</sup>.  
629 Briefly, AlphaFold2, implemented in ColabFold, was utilized with default settings for predicting the protein  
630 structures of various sarbecovirus RBDs and ACE2 orthologues. The top ranked model was used for all subsequent  
631 analyses. The docking of the ACE2 ectodomain in complex with RBD was accomplished using HDOCK (v.1.1).  
632 Structural representations and analyses were carried out within ChimeraX. The hydrogen bonds and clashes between  
633 the displayed amino acids were analyzed using the H-bonds and clashes command. RMSD values for structural  
634 superimpositions were calculated using the matchmaker command. The reported RMSD values specifically pertain  
635 to RBM Cα atoms. The following cryo-EM complex structures in the PDB database were also used for structural  
636 analysis in this study: human ACE2/SARS-CoV-2-RBD (Protein Data Bank 6M0J), human ACE2/SARS-CoV-1-  
637 RBD (3SCI), human ACE2/RaTG13-RBD (7DRV), human ACE2/GX-P2V-RBD (7DDP), human ACE2/SARS-  
638 CoV-2 alpha variant-RBD (7EKF), human ACE2/RshSTT200-RBD (7XBH), Rhinolophus alcyone ACE2/PRD-  
639 0038-RBD (8U0T), and RsYN04 RBD/antibody S43 (8J5J).

640  
641 **Western Blot.** To examine the intracellular sarbecoviruses spike protein expression levels, HEK293T cells were  
642 transfected with plasmids encoding the viral spike proteins fused with a C-terminal HA-tag. After 24 hours, cells  
643 were washed with PBS, lysed on ice for 10 min in 2% TritonX-100/PBS containing 1mM PMSF (Beyotime, ST506).  
644 The cell lysates were clarified by centrifugation at 12,000 rpm for 5 mins at 4 °C. The supernatants were mixed with  
645 1:5 (v/v) 5× SDS-loading buffer and incubated at 95 °C for 5 min. For evaluating the spike protein levels in  
646 pseudovirus (PSV) particles in the cultured medium, PSV was concentrated with a 30% sucrose cushion (30% sucrose,  
647 15 mM Tris-HCl, 100 mM NaCl, 0.5 mM EDTA) at 20,000×g for 1.5 hours at 4 °C. The concentrated PSV was then  
648 resuspended in 1×SDS loading buffer and incubated at 95 °C for 30 min. Following SDS-PAGE and PVDF membrane

649 transfer, the blots were blocked with 10% milk in PBS containing 0.1% TBST (20 mM Tris-HCl pH 8.0, 150 mM  
650 NaCl) supplemented with 0.05% Tween-20 at room temperature for 1 hour. Primary antibodies targeting HA (MBL,  
651 MBL-M180-3),  $\beta$ -tubulin (Immunoway, YM3030), or VSV-M (Kerafast, EB0011) were applied at a 1:10,000 dilution  
652 in TBST with 1% milk. After three washes with TBST, blots were incubated with the secondary antibody Peroxidase  
653 AffiniPure Goat Anti-Mouse IgG (H+L) (Jackson Immuno Research, 115-035-003). Blots were further washed three  
654 times before chemiluminescence detection (SQ201, Yamei Biotech) using the ChemiDoc MP Imaging System (Bio-  
655 Rad).

656

657 **Geographical distribution of bat species.** The global distribution data of bat species were obtained from the IUCN  
658 Red List of Threatened Species 2020, the base layer of the map (version 5.1.1) was sourced from Natural Earth,  
659 available at (<https://www.naturalearthdata.com/downloads/110mcultural-vectors/>). GeoScene Pro 21 was utilized to  
660 visualize and analyze the bat distribution data.

661

662 **Statistical analysis and data presentation.** Most experiments were conducted 2-4 times with three biological repeats.  
663 Representative results were shown. Heat maps were generated based on RLU or RFU values, with background  
664 (control cells expressing APN) signals subtracted. Data are presented as means  $\pm$  standard deviation(SD) as  
665 indicated in the figure legends. All statistical analyses were conducted using Prism 7 software (GraphPad). Two-  
666 tailed unpaired (Student's) t-test was performed if only two conditions were compared. One-way ANOVA analysis,  
667 followed by Dunnett's test, was employed for multiple comparisons. The association between the entry/binding  
668 efficiency and the presence of RBM disulfide was assessed using the chi-squared test.  $P < 0.05$  was considered  
669 significant. \* $P < 0.05$ , \*\* $P < 0.01$ , \*\*\* $P < 0.005$ , and \*\*\*\* $P < 0.001$ .

670

## 671 **References**

672

673 55. Nakamura, T., Yamada, K. D., Tomii, K. & Katoh, K. Parallelization of MAFFT for large-scale multiple  
674 sequence alignments. *Bioinforma. Oxf. Engl.* **34**, 2490–2492 (2018).

675 56. Nguyen, L.-T., Schmidt, H. A., von Haeseler, A. & Minh, B. Q. IQ-TREE: a fast and effective stochastic  
676 algorithm for estimating maximum-likelihood phylogenies. *Mol. Biol. Evol.* **32**, 268–274 (2015).

677 57. Schwegmann-Weßels, C. *et al.* Comparison of vesicular stomatitis virus pseudotyped with the S proteins from  
678 a porcine and a human coronavirus. *J. Gen. Virol.* **90**, 1724–1729 (2009).

679 58. Fukushi, S. *et al.* Vesicular stomatitis virus pseudotyped with severe acute respiratory syndrome coronavirus  
680 spike protein. *J. Gen. Virol.* **86**, 2269–2274 (2005).

681 59. Ma, C. *et al.* Broad host tropism of ACE2-using MERS-related coronaviruses and determinants restricting viral  
682 recognition. *Cell Discov.* **9**, 57 (2023).

683 60. Nie, J. *et al.* Quantification of SARS-CoV-2 neutralizing antibody by a pseudotyped virus-based assay. *Nat.*  
684 *Protoc.* **15**, 3699–3715 (2020).

685 61. Whitt, M. A. Generation of VSV pseudotypes using recombinant  $\Delta$ G-VSV for studies on virus entry,  
686 identification of entry inhibitors, and immune responses to vaccines. *J. Virol. Methods* **169**, 365–374 (2010).

687 62. Jumper, J. *et al.* Highly accurate protein structure prediction with AlphaFold. *Nature* **596**, 583–589 (2021).

688 63. Yan, Y., Tao, H., He, J. & Huang, S.-Y. The HDOCK server for integrated protein-protein docking. *Nat. Protoc.*  
689 **15**, 1829–1852 (2020).

690 64. Yan, Y., Wen, Z., Wang, X. & Huang, S.-Y. Addressing recent docking challenges: A hybrid strategy to integrate  
691 template-based and free protein-protein docking. *Proteins* **85**, 497–512 (2017).

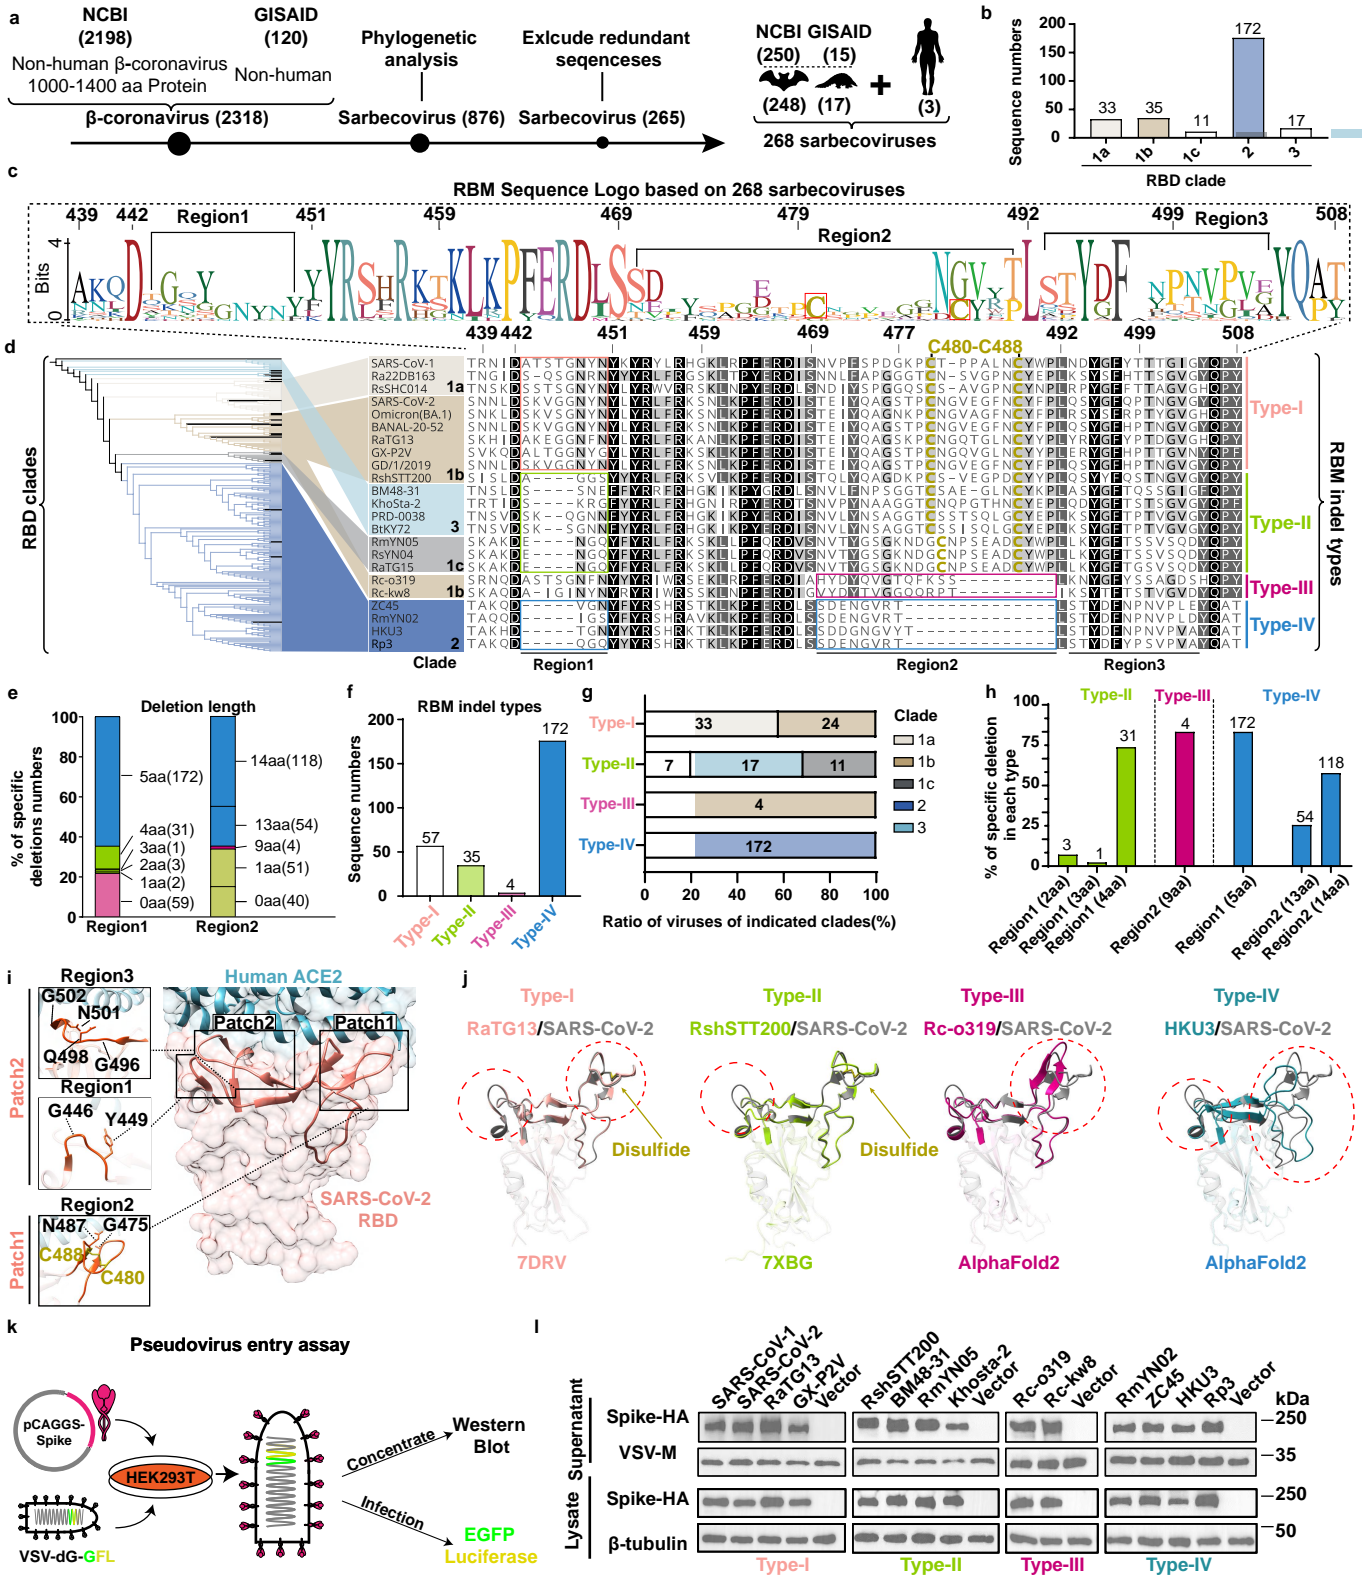

**Fig.1| Phylogenetic and structural analysis of sarbecovirus categorized into four indel types.**

**a**, Flow diagram illustrating the retrieval of 265 non-redundant spike sequences from non-human sarbecovirus, and three additional human sarbecoviruses. **b**, The RBD clade information of the 268 sarbecoviruses. **c**, RBM sequence logo illustrating the three high variable regions (numbering based on SARS-CoV-2). **d**, Phylogenetic tree based on RBD amino acids for the 268 sarbecoviruses (details in Extended Data Fig. 1) and multi-sequence alignment of 23 representative sarbecoviruses with four RBM indel types. **e**, Summary of the deleted residue numbers in Region1 and Region2 compared with SARS-CoV-2 sequence. The numbers of each deletion length are indicated in the parentheses. **f**, The sequence numbers of the four RBM indel types. **g**, Distribution of RBD clades in different indel types. **h**, Analysis of the reduced length of Region1 and Region2 indels in each RBM indel types. **i**, Structural display of the two interaction patches in the SARS-CoV-2 RBD/hACE2 complex (6M0J). Residues involved in receptor recognition are indicated in the close-up views of the two interaction patches. Region 1,2 and 3 in RBD (Region 1 and 3 comprise Patch 2, while Region 2 consists of Patch 1). **j**, Structure superimposing of SARS-CoV-2 RBD (6M0J) with RBDs from representative viruses belonging to each indel types. **k**, Schematic illustration of the VSV-based pseudovirus entry assay. **l**, Western Blot detecting the level of spike protein of 14 selected sarbecoviruses in lysate or supernatant, with VSV-M and  $\beta$ -tubulin serving as loading controls.

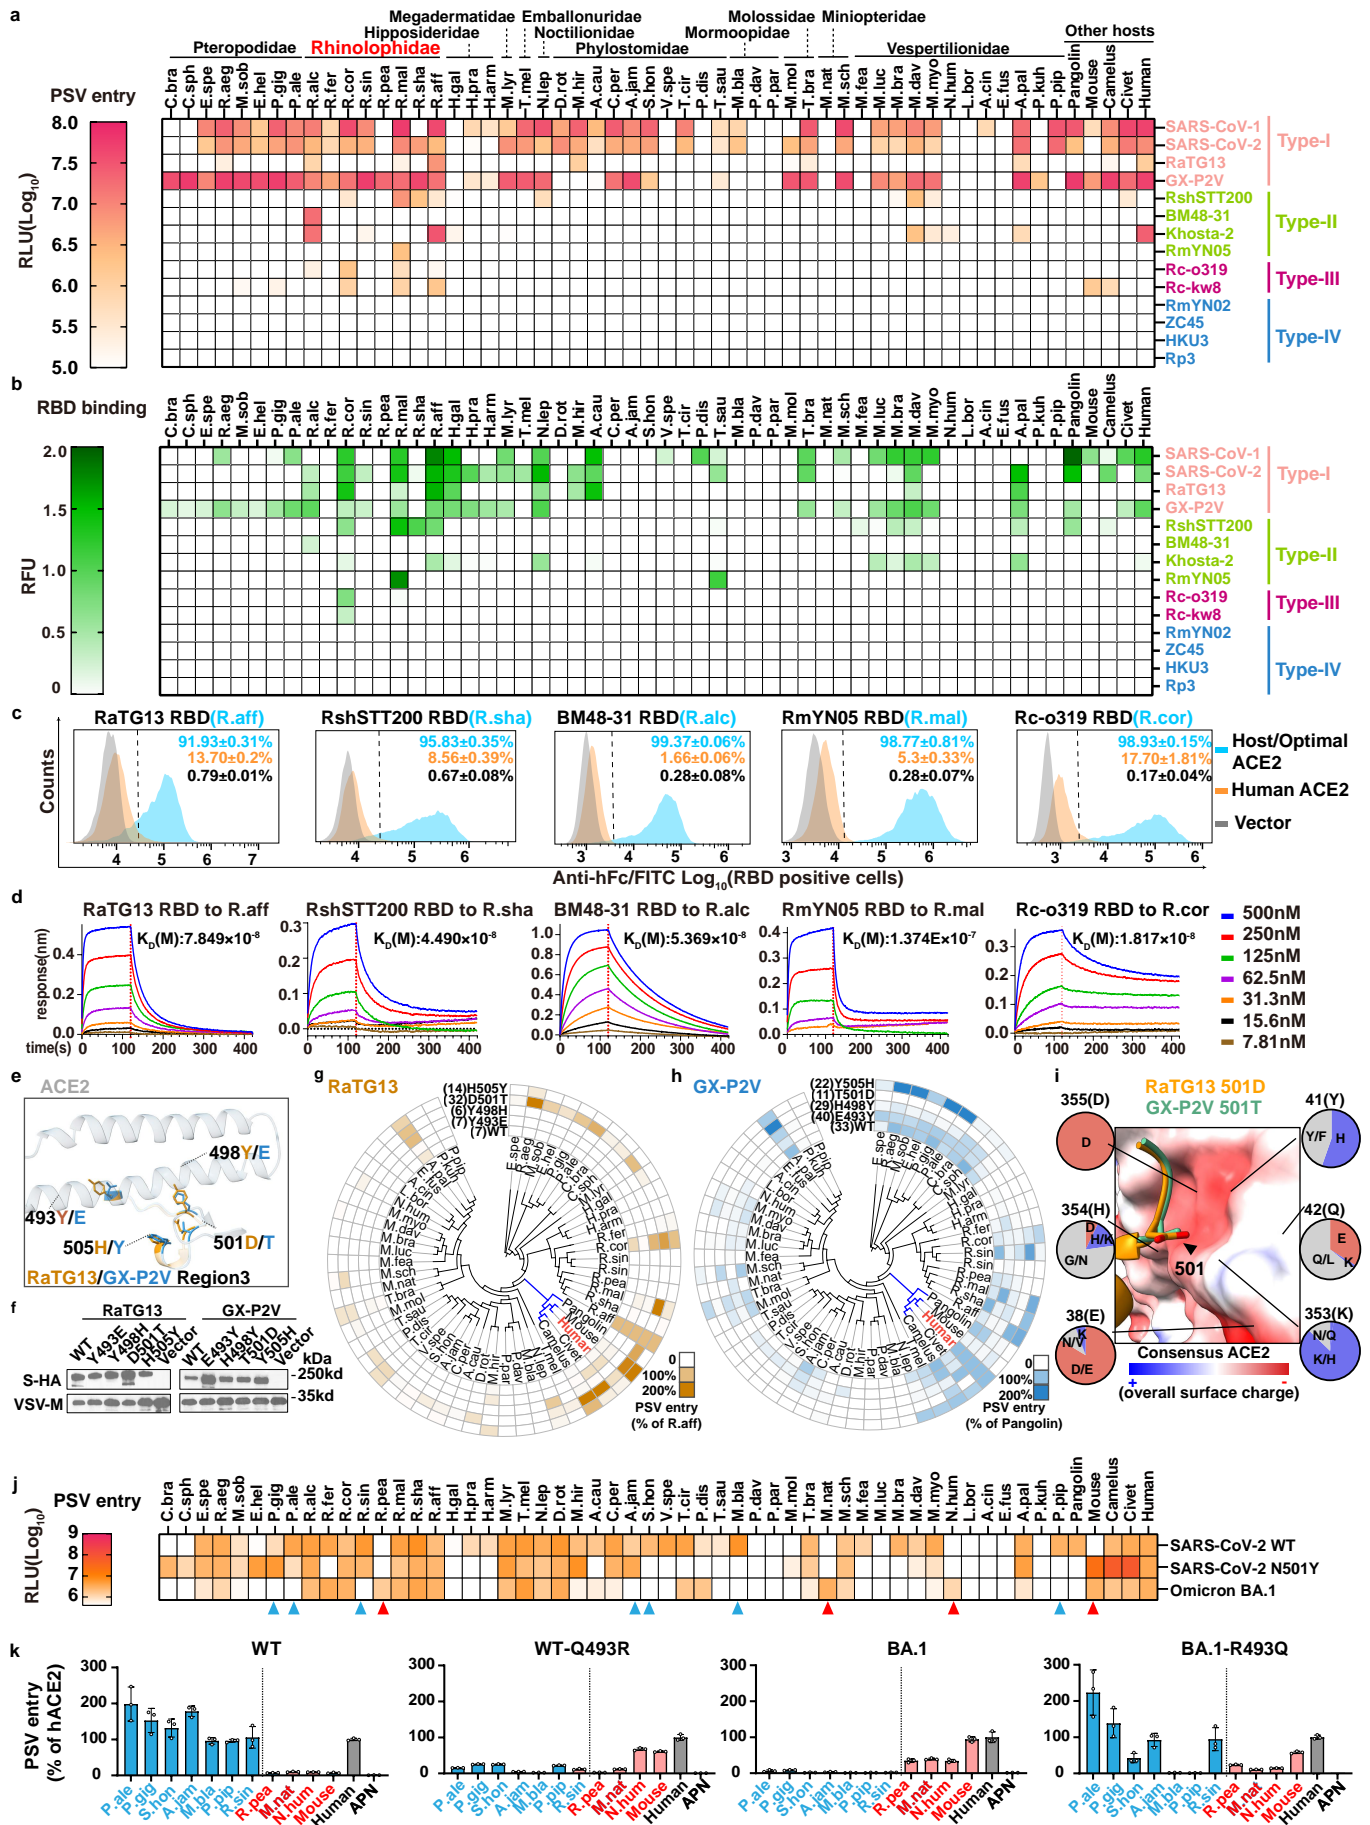

**Fig.2| Multi-species ACE2 tropism of 14 representative sarbecoviruses and the contribution of critical RBM residues.**

**a, b**, Multi-species ACE2 usage spectra of sarbecoviruses of different indel types. PSV entry (**a**) and RBD binding (**b**) of 14 sarbecoviruses based on HEK293T cells stably expressing the 56 ACE2 orthologues from bats and selected mammals **c, d**, RBD binding efficiencies of selected sarbecoviruses favoring their hosts' ACE2 (or the optimal ACE2) analyzed by Flow cytometry (**c**) or Biolayer interferometry (BLI) (**d**). **e, f**, Structural demonstration (PDB IDs: 7DRV, 7DDP) (**e**) and spike protein packaging efficiencies (**f**) of RaTG13 and GX-P2V swap mutants. **g, h**, Heat map displaying PSV entry efficiencies of RaTG13 and GX-P2V swap mutants in HEK293T cells expressing the indicated ACE2 orthologues. PSV entry > 5% is considered as an effective entry and the number of ACE2 support entry is showed in parentheses (SARS-CoV-2 numbering). **i**, Negative charged surface of the consensus ACE2 (based on 56 ACE2 orthologues) spatially proximate to residue 501 of RaTG13 and GX-P2V. The structure of consensus ACE2 is predicted by AlphaFold2, and the interaction is predicted by HDOCK. **j**, PSV entry efficiencies of SARS-CoV-2 WT, N501Y, and Omicron BA.1 in HEK293T stably expressing the 56 ACE2s orthologues. Red triangle: increased efficiencies to support Omicron; Blue triangle: reduced efficiency to support Omicron. **k**, PSV entry efficiencies of SARS-CoV-2 mutants in HEK293T stably expressing the indicated ACE2 orthologues. RLU: Relative Luminescence Units; RFU: Relative Fluorescence Units. The amino acid usage of the residues consisting of the surface are indicated. Data representative of 2-3 independent experiments for a, b, g, h, j, and k (n=3 biological replicates). Mean  $\pm$  SD for k.



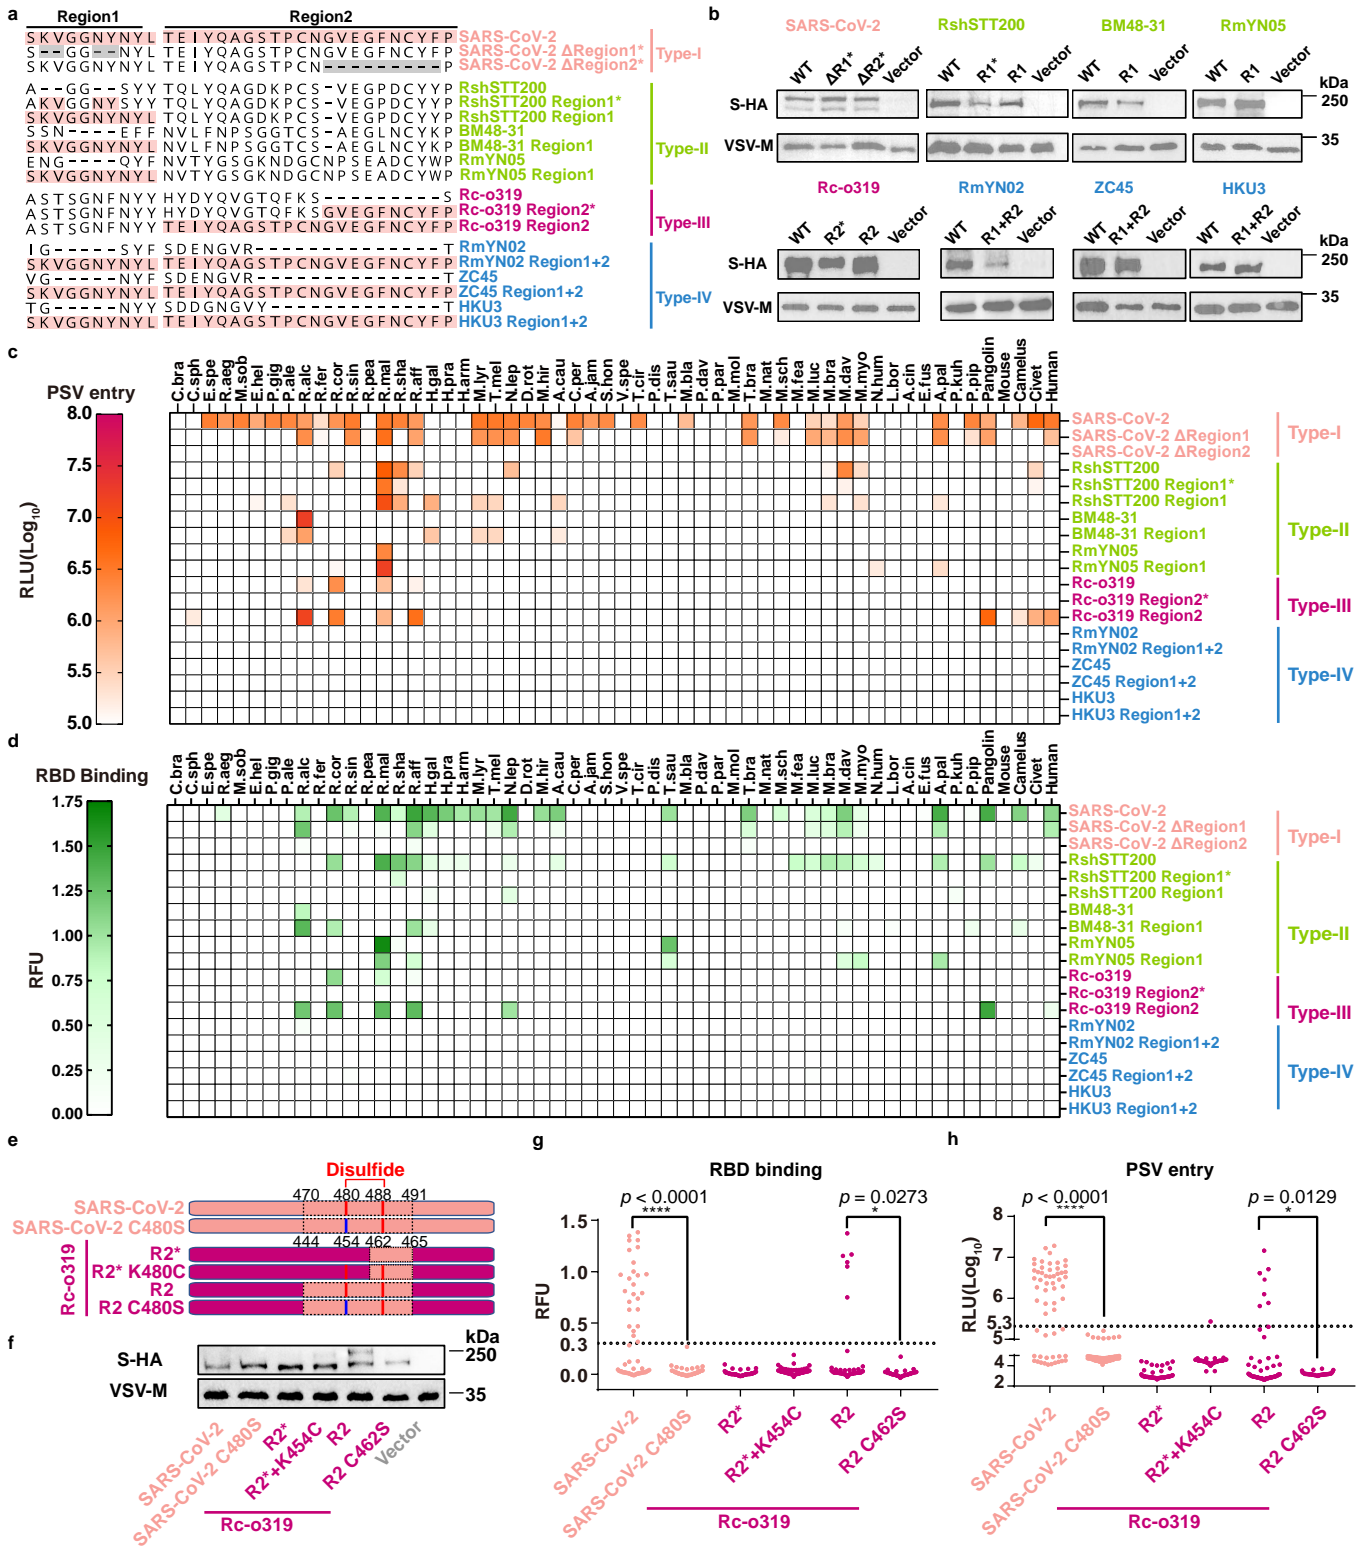

**Fig3| The impact of Region1 and Region2 deletions on multi-species ACE2 tropism of different Sarbecoviruses.**

**a**, Illustration displaying the Region1 and Region 2 substitutions in sarbecoviruses of different indel types. Light pink: insertion corresponding to SARS-CoV-2 counterparts; gray: deletions corresponding to type II and type III sarbecoviruses. **b**, Western blot detecting the spike protein packaging efficiency in PSV particles. **c, d**, PSV entry (**c**) and RBD binding(**d**) efficiency of sarbecoviruses and their region substitution mutants in HEK293T stably expressing the 56 ACE2 orthologues. **e-h**, Disulfide bonds in Region2 is critical for multi-species ACE2 usage for sarbecoviruses. Cartoon illustration displaying the Region2 disulfide-related mutants based on SARS-CoV-2, Rc-o319 and their region 2 substitution mutants (**e**). Spike protein package efficiency (**f**), RBD binding efficiency (**g**), and PSV entry efficiency (**h**) of SARS-CoV-2 and Rc-o319 mutants in HEK293T stably expressing the 57 ACE2 orthologues. Dots represent different ACE2 orthologues. Dashed lines: background cut-off of RBD binding and PSV entry assays. Data are presented in c and d for n=2-3 biologically independent cells. Chi-squared test was used for statistical analysis of significance for g and h. \*:P<0.05, \*\*\*\*:P<0.0001. RLU: Relative Luminescence units; RFU: Relative Fluorescence Units.

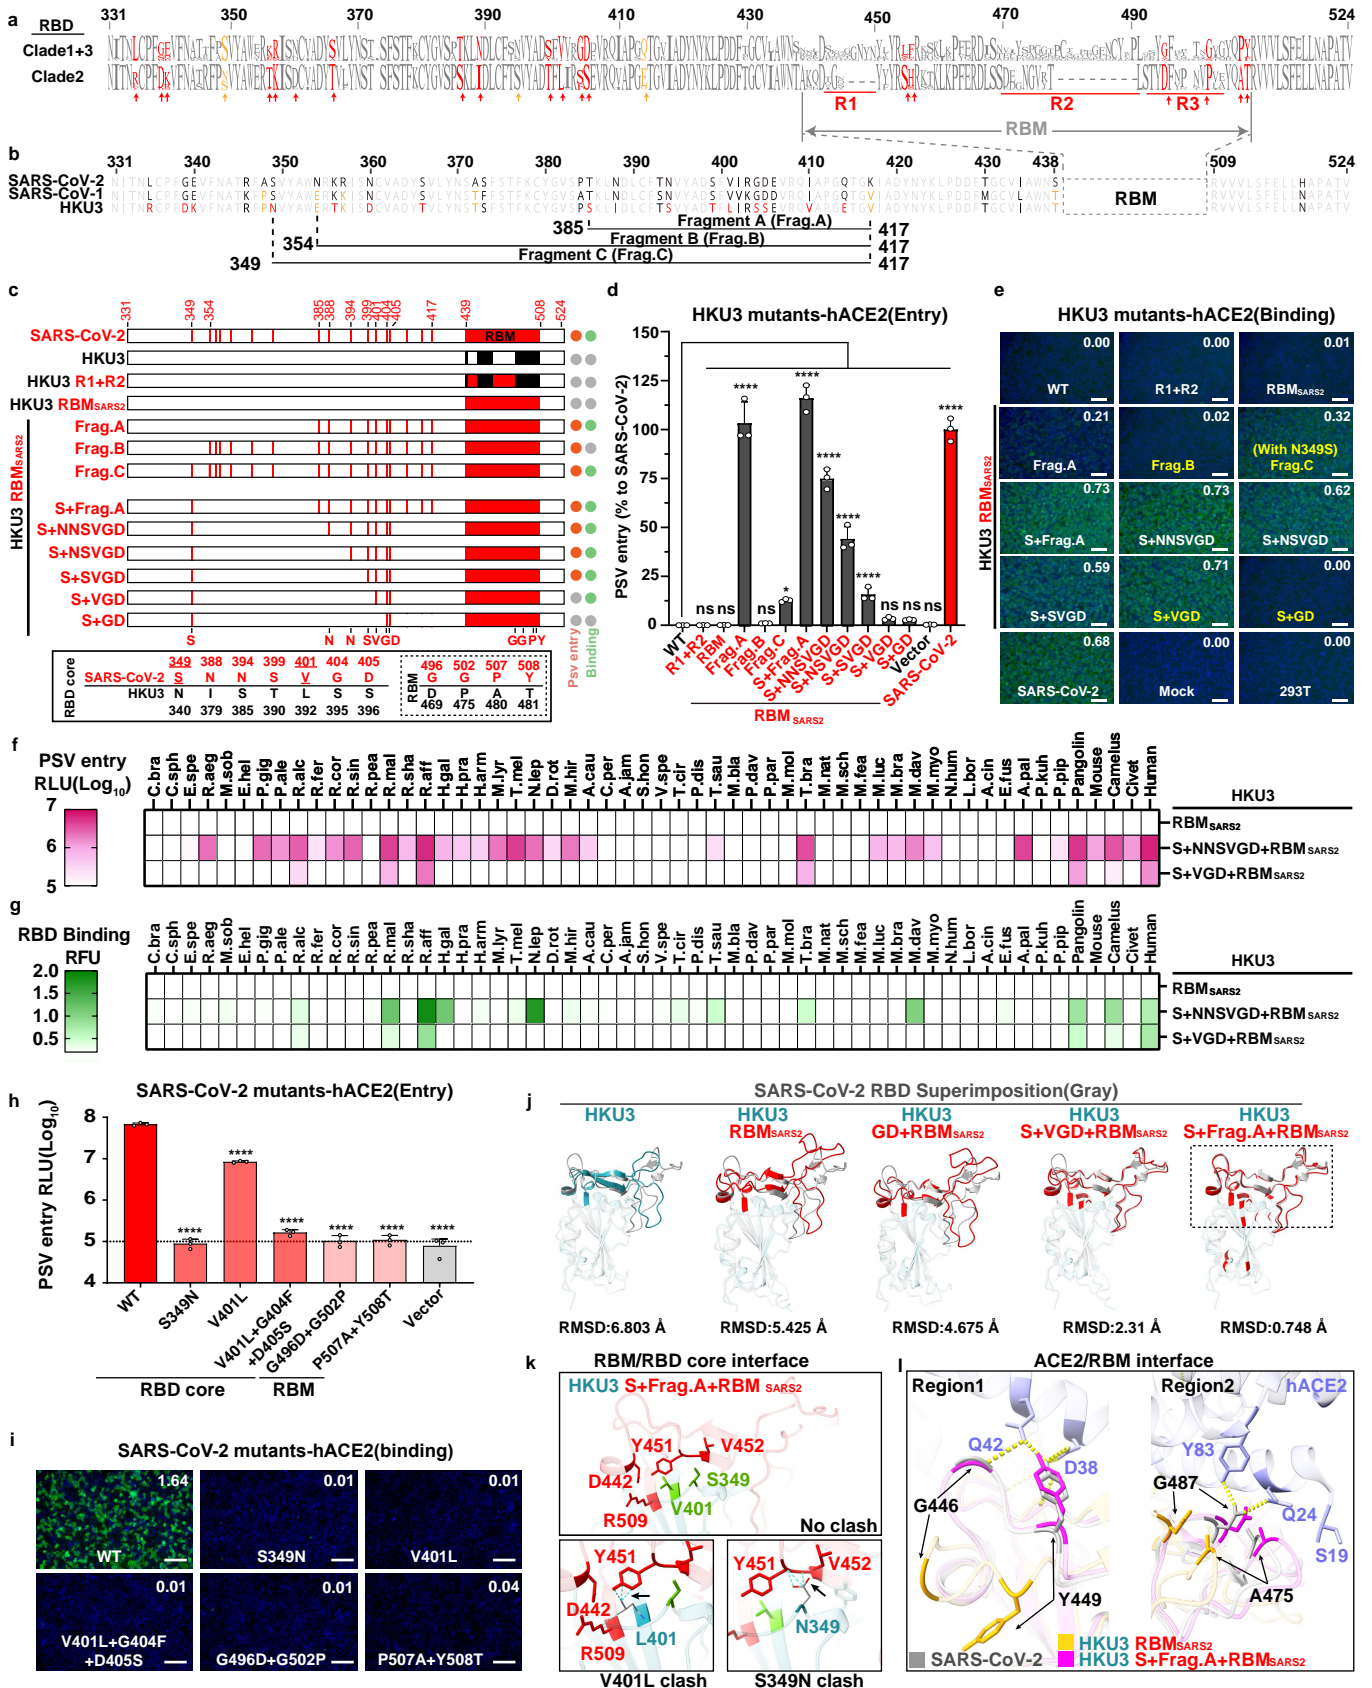

**Fig.4| Fine mapping of Clade-2 specific residues outside the RBM restricting ACE2 recognition.**

**a**, RBD residue usage (SARS-CoV-2 numbering) of sarbecoviruses grouped by ACE2 usage. Red: Clade 2-specific residues. Orange: limited Clade 2 specificity. **b**, RBD sequences alignment of SARS-CoV-2, SARS-CoV-1 and HKU3. Red: HKU3-specific; Orange: shared by HKU3 and SARS-CoV-1 only. The three fragments (Frag.) for subsequent mapping are indicated. **c-g**, Fine mapping of residues restricting ACE2 usage outside the RBM. Mapping strategy for narrowing down the determinants critical for ACE2 recognition (**c**). Orange and green circles: capability of using hACE2 for entry (>1% of SARS-CoV-2 entry) and binding (RFU>0.2), respectively. Gray: unable to use hACE2. Underlines: two critical residues dictating RBD binding. PSV entry (**d**) and RBD binding (**e**) of the HKU3 mutants carrying SARS-CoV-2 corresponding sequences in HEK293T-hACE2. Yellow highlighted the mutants critical for analyzing ACE2-restricting determinants. PSV entry (**f**) and RBD binding (**g**) of HKU3 mutants with restored ACE2 binding affinity. **h-i**, PSV entry (**h**) and RBD binding (**i**) of SARS-CoV-2 mutants carrying Clade 2-specific restricting residues in HEK293T-hACE2. **j-l**: Mechanisms of ACE2 restriction by clade-specific residues outside the RBM. RBD superimposition (**j**) of SARS-CoV-2 (PDB:6M0J) with HKU3 and HKU3-derived mutants predicted by Alphafold2. Red: SARS-CoV-2 equivalent sequences. RMSD: root mean square deviation based on RBM (69 C $\alpha$  atoms). Close-up view (**k**) of V401L and S349N on HKU3 S+Frag.A+RBM mutations that form steric hindrance with RBM that potentially inducing the RBM conformational shift. The loss of ACE2 interactions in HKU3 carrying SARS-CoV-2 RBM compared with HKU3 S+Frag.A+RBM mutant (**l**). Blue dashed line: Clashes; Yellow dashed line: H-Bond. One-way ANOVA analysis, followed by Dunnett's test for **d** and **h**, mean  $\pm$  SD. Scale bar, 200  $\mu$ m. Data representative of 2 or 3 independent experiments for d, e, h and i (n=3 biological replicates).

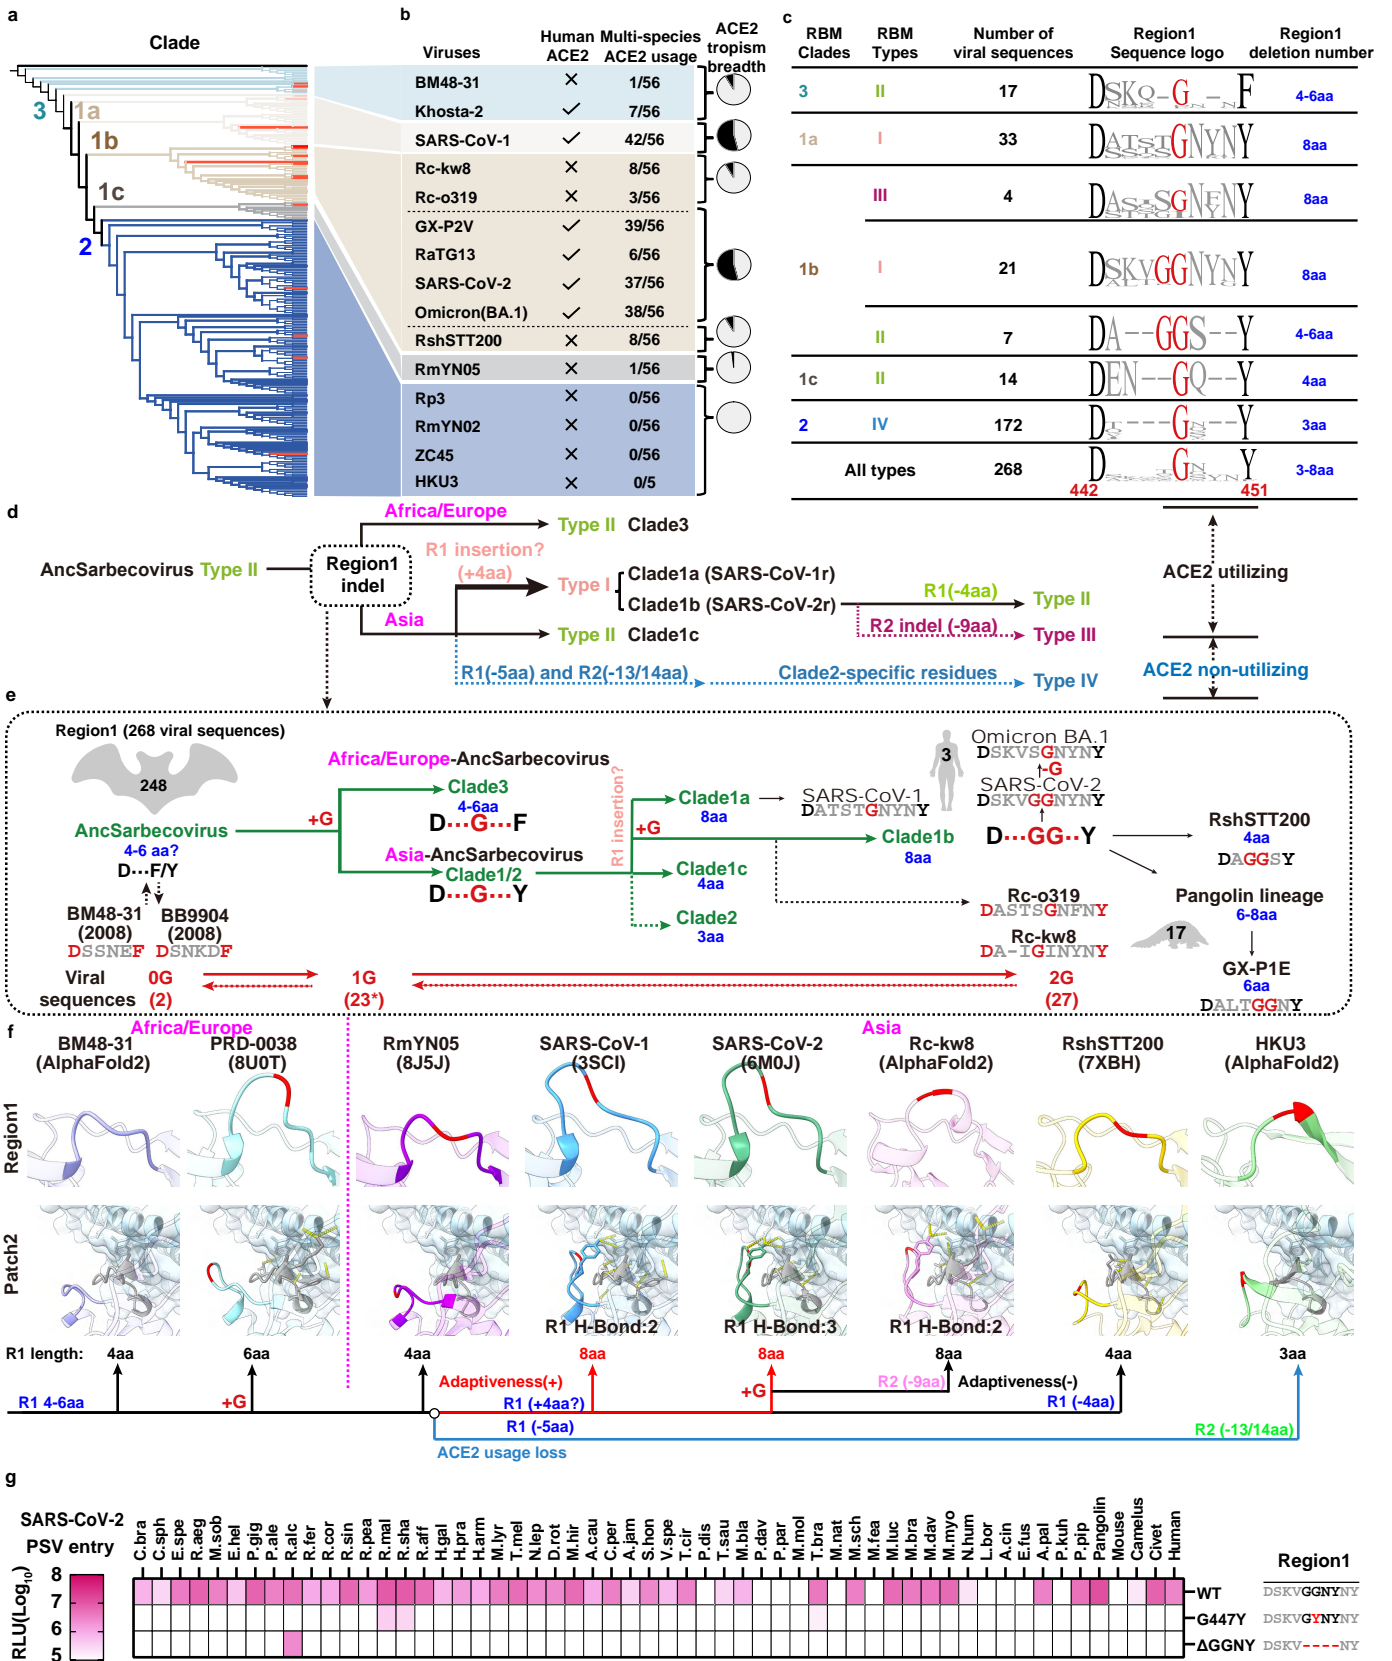

**Fig.5| The proposed coevolution of sarbecovirus RBM indels and their impact on multi-species ACE2 adaptiveness.**

**a**, The phylogenetic tree based on RBD protein sequences using maximum likelihood analysis (details in Extended Data Fig. 1). The red lines mark the sarbecoviruses tested in this study. **b**, Summary of the number of supportive ACE2 orthologues (data based on Fig.2a and j with  $RLU > 2 \times 10^5$ ) and hACE2 compatibility of the indicated sarbecoviruses. Coloring is based on RBD clades. **c**, Region1 sequence logo (SARS-CoV-2 numbering) of sarbecoviruses grouped by different indel types in each clade. The highly conserved D442, F/Y451 for defining the boundary of Region 1 and the featured glycine (G) are highlighted in red. **d**, The proposed evolutionary of sarbecoviruses RBD clades and RBM indel types. **e**, Details of Region 1 sequence changes along with the formation of different clades during the evolution of sarbecoviruses in bats, pangolins, and humans. The Region 1 numbers in each group are indicated in blue. The emergence of the highly conserved glycine (1G) and the double G (2G) in most clade1b sarbecoviruses are highlighted in red. **f**, The RBD-ACE2 complex structures or models of sarbecoviruses with distinct Region 1 sequences. Region 1 is highlighted with distinct colors without transparency, the featured G is marked in red (upper). ACE2 and Region 3 is displayed in light blue and gray with transparency, respectively. Yellow dotted lines: H-bond or salt bridge. Dotted lines indicate the events with low confidence for **d** and **e**. **g**, PSV entry of SARS-CoV-2 R1 mutants in HEK293T expressing the indicated ACE2 orthologues.



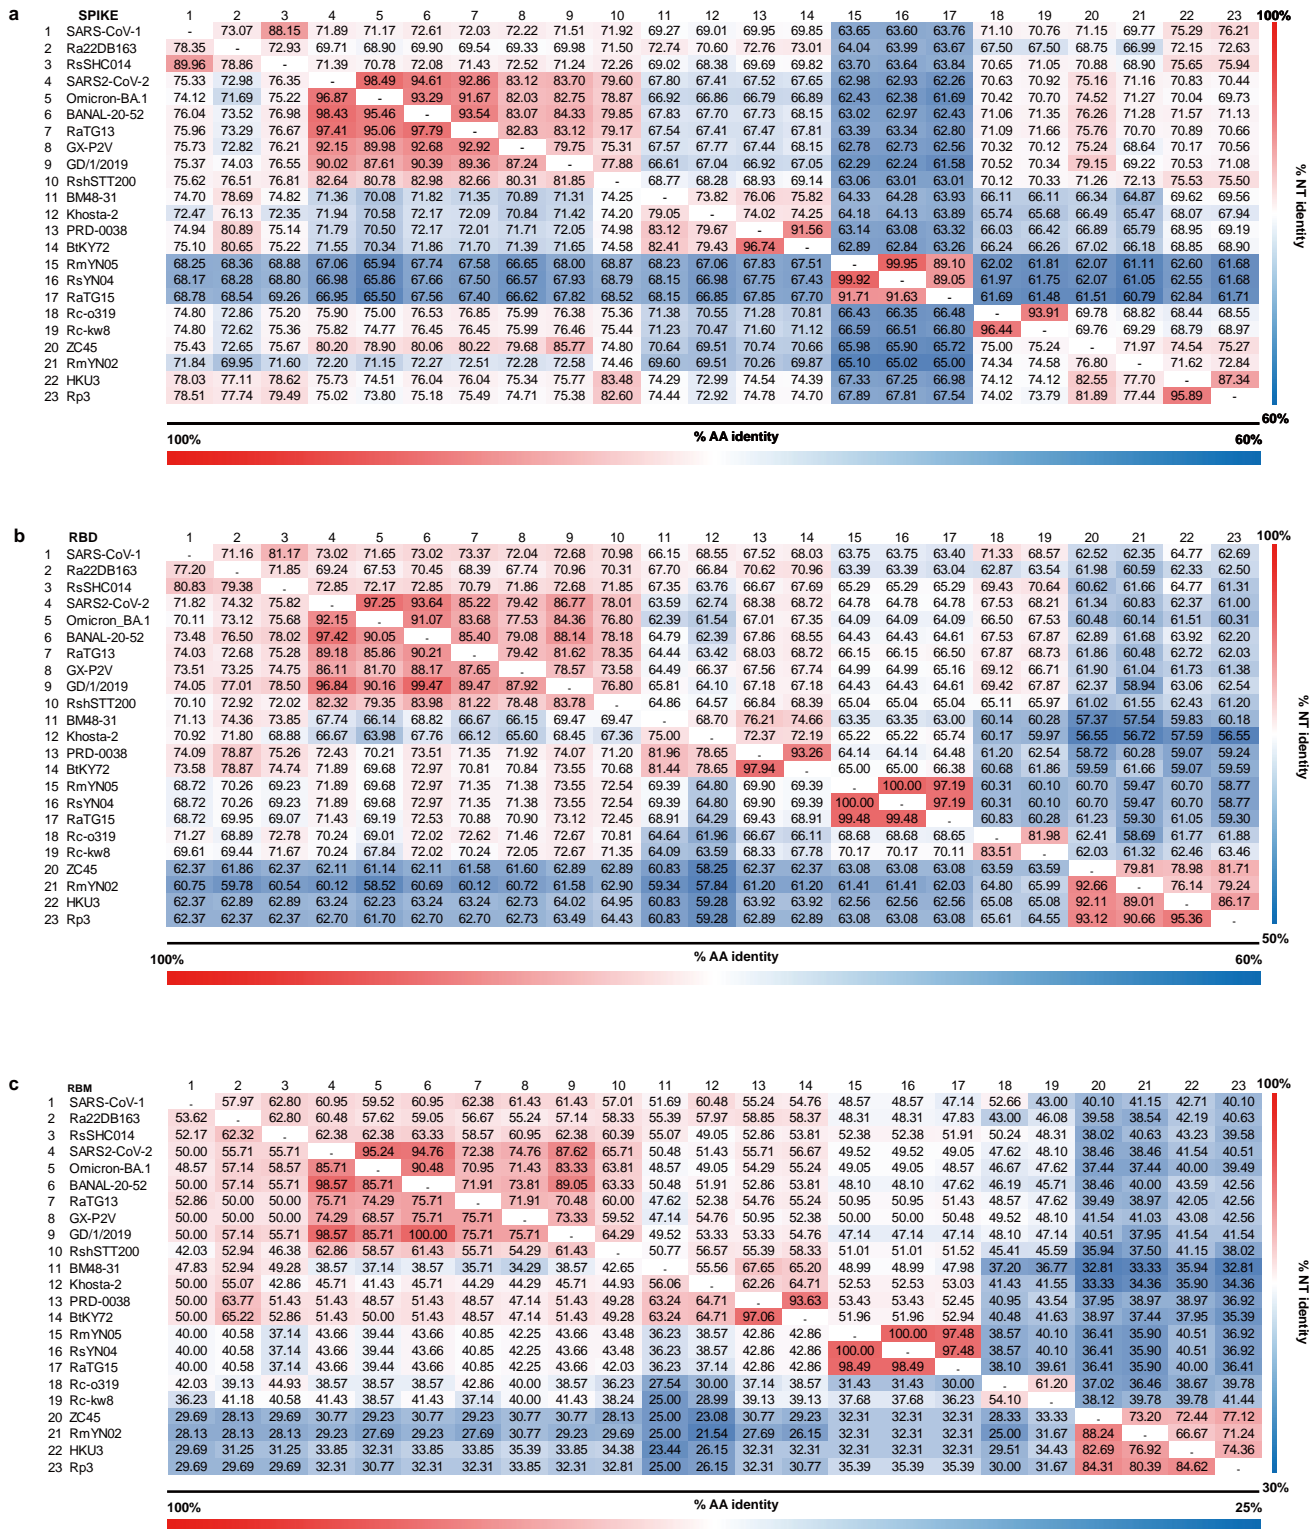



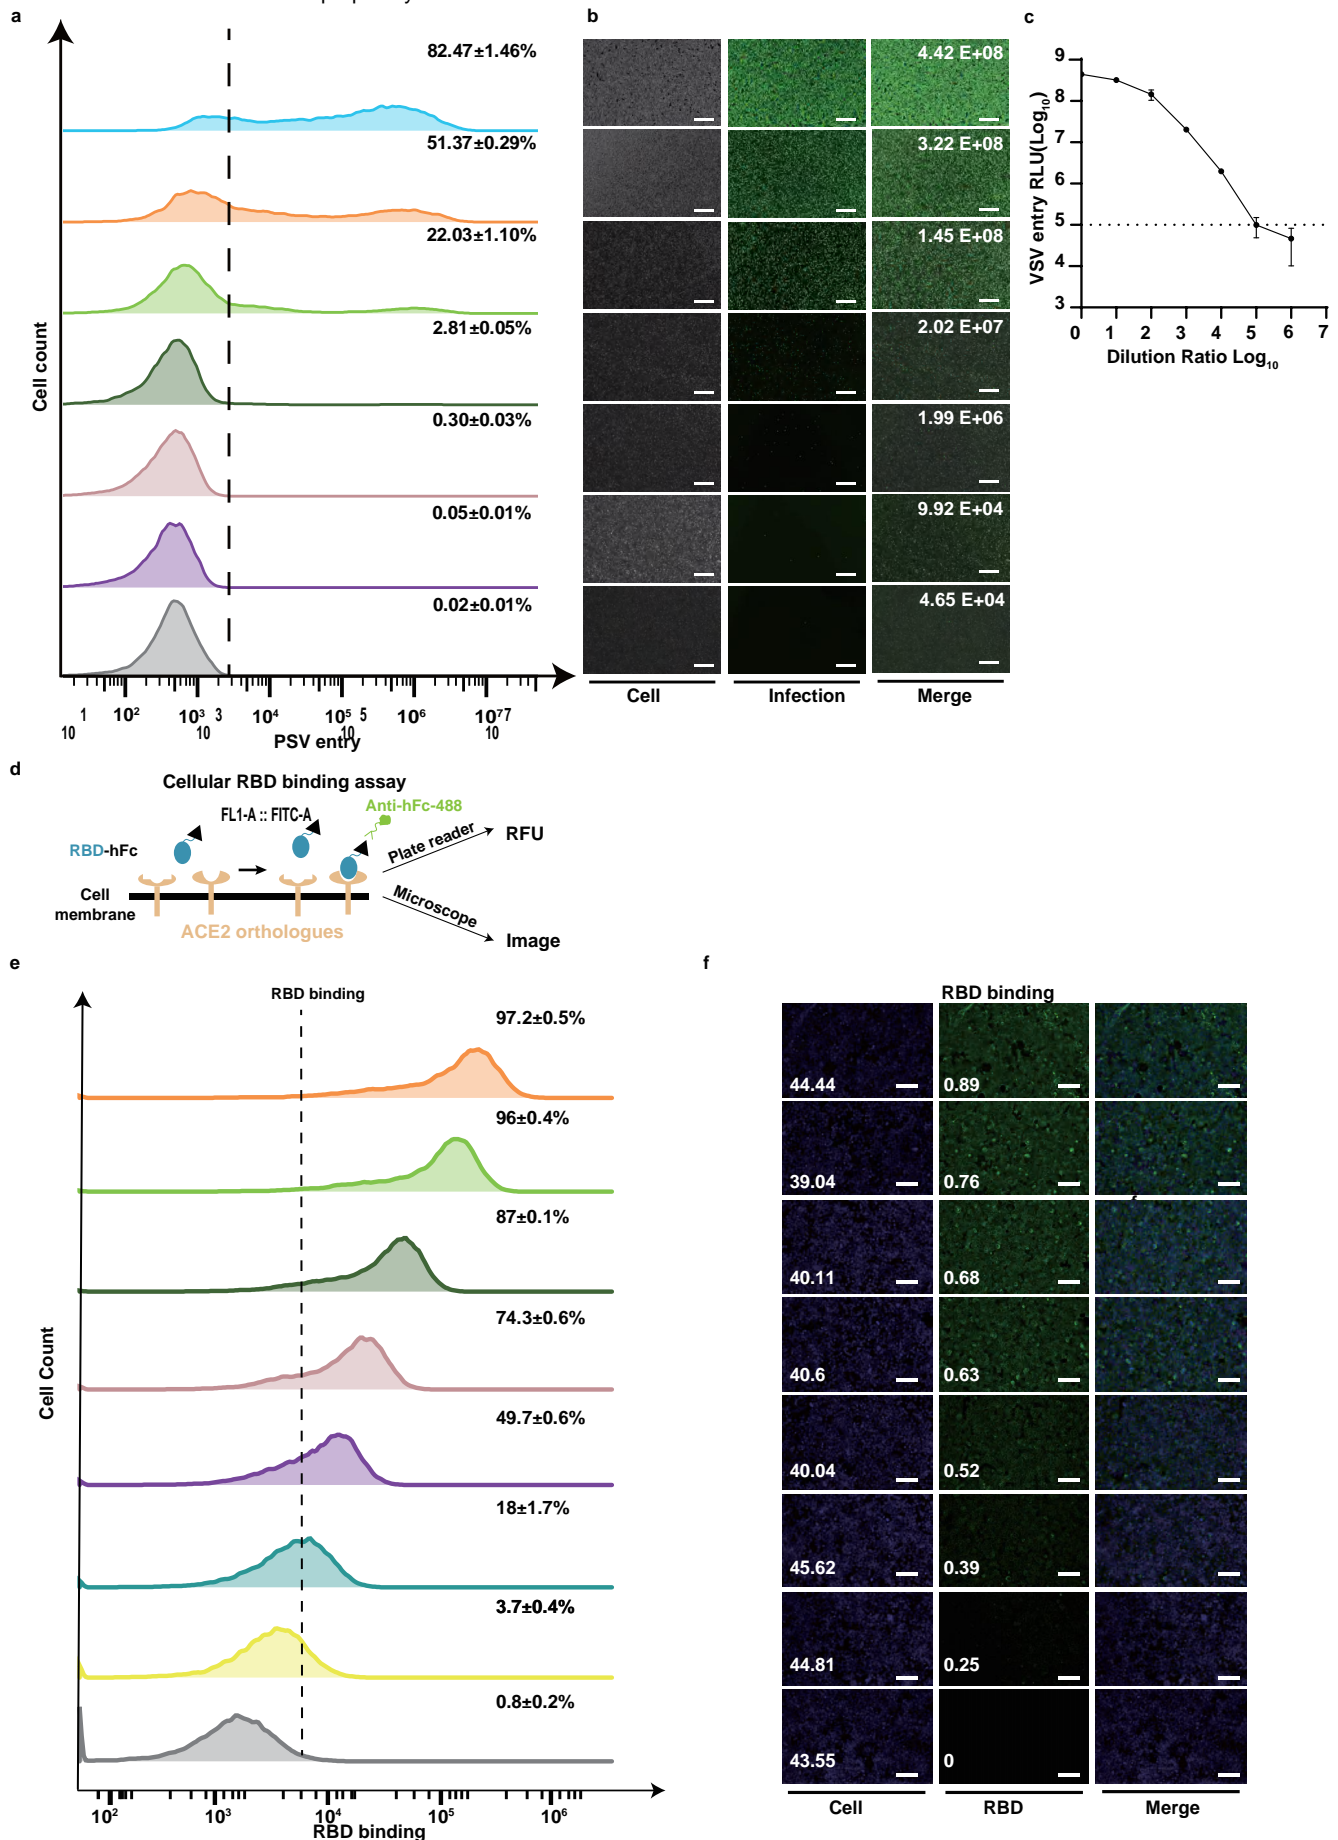

**Extended Data Fig. 3| Characterization of quantitative RBD binding and PSV entry assays.** **a-c**, Comparison of PSV entry efficiencies demonstrated by flow cytometry (**a**), GFP expression (**b**) and RLU (**c**). **d**, Schematic illustration of cellular RBD-hFc binding assay. **e, f**, Comparison of binding efficiencies based on flow cytometry (**e**) and quantitative immunofluorescence (**f**) assays. Scale bar, 200  $\mu$ m.

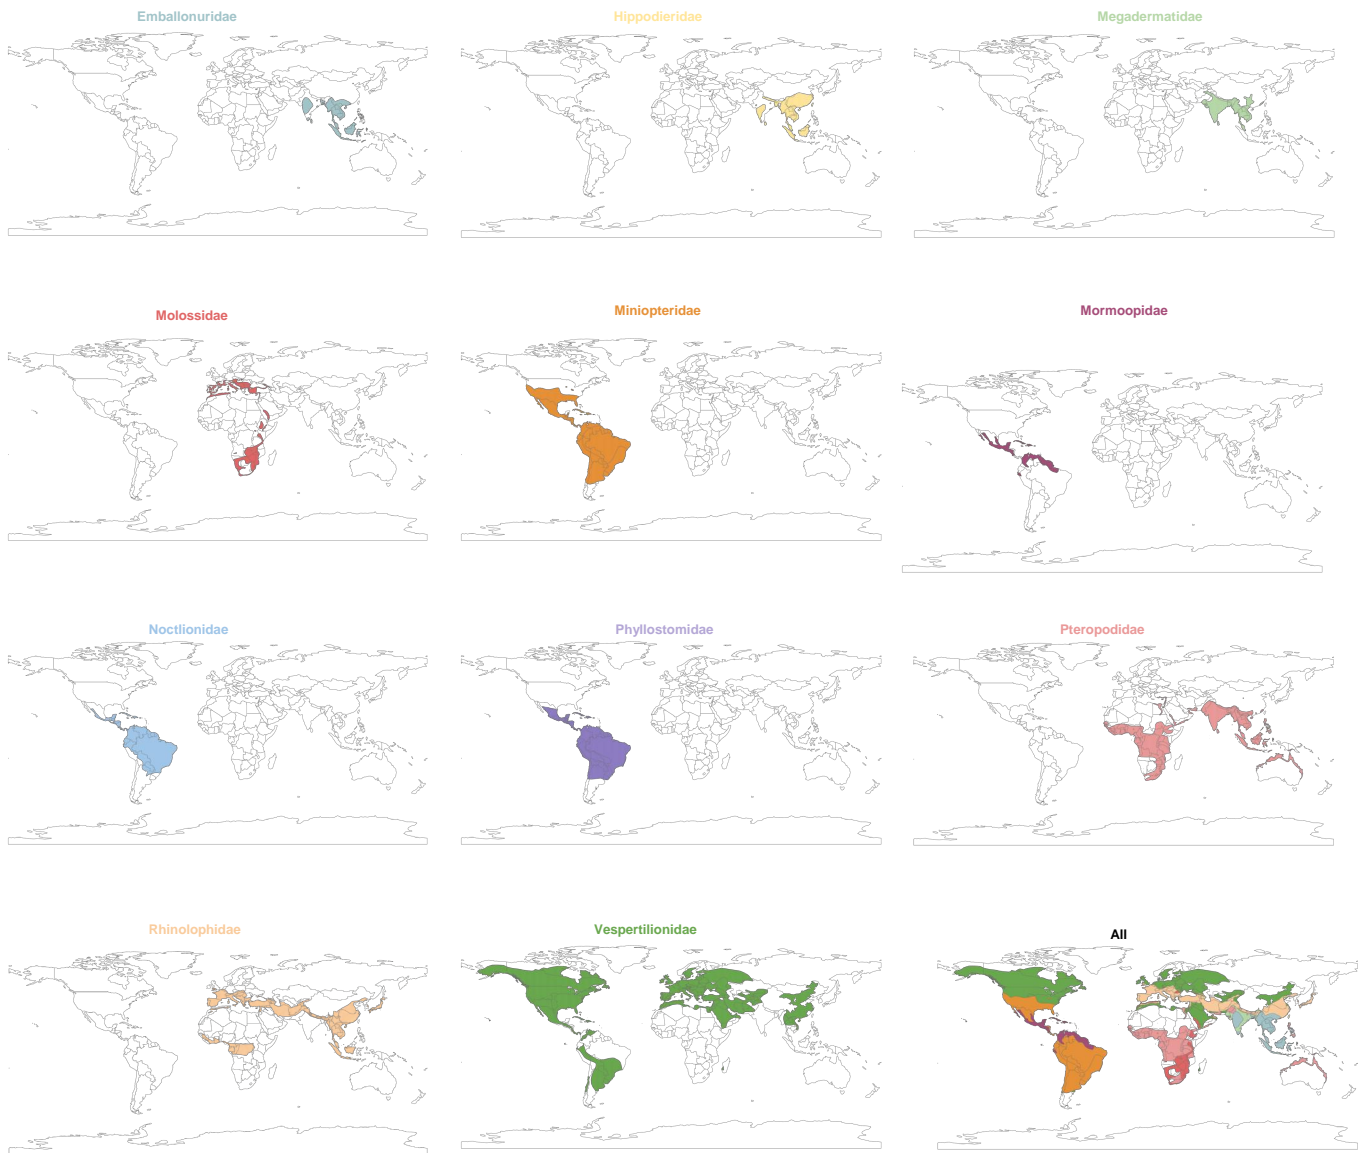

**Extended Data Fig. 4| The geographical distribution of 11 bat families encompassing the 51 bat species in this study.** Data are retrieved from The IUCN Red List website (<https://www.iucnredlist.org/>) and the distribution are generated by the GeoScene Pro software.

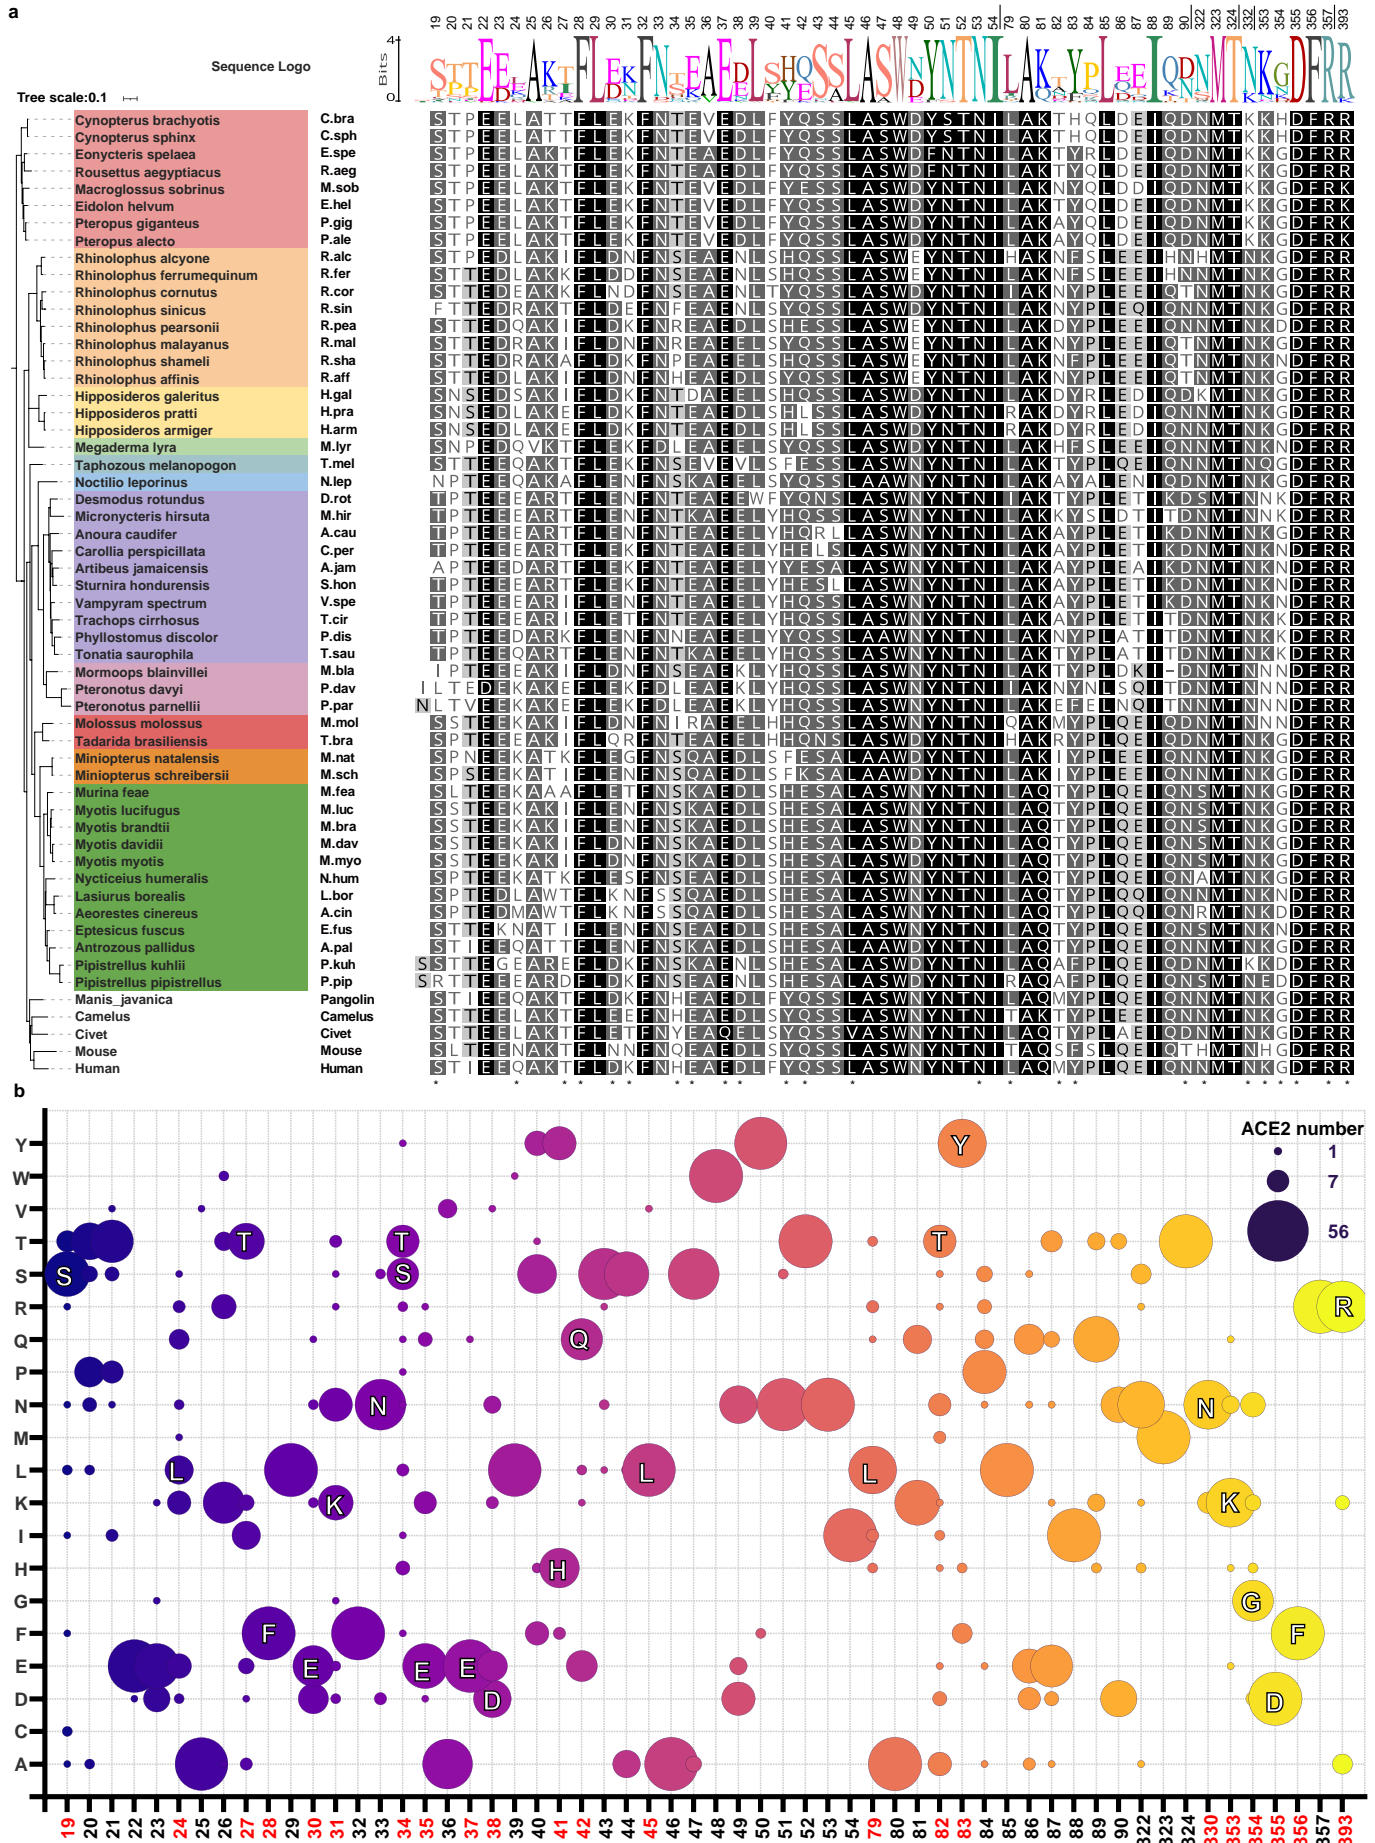

**Extended Data Fig. 5 | Phylogenetic and sequence analysis of the 56 ACE2 orthologues. a,** The phylogenetic tree generated by iq-tree with maximum likelihood analysis. The multi-sequence alignment and sequence logo are analyzed by MAFFT and Geneious, respectively. Asterisks: critical residues for SARS-CoV-2 interaction (PDB: 6M0J). **b,** Bubble chart demonstrating the amino-acid usage of the viral binding sequences of 56 ACE2 orthologues. Residues critical for SARS-CoV-2 interaction are highlighted in red.

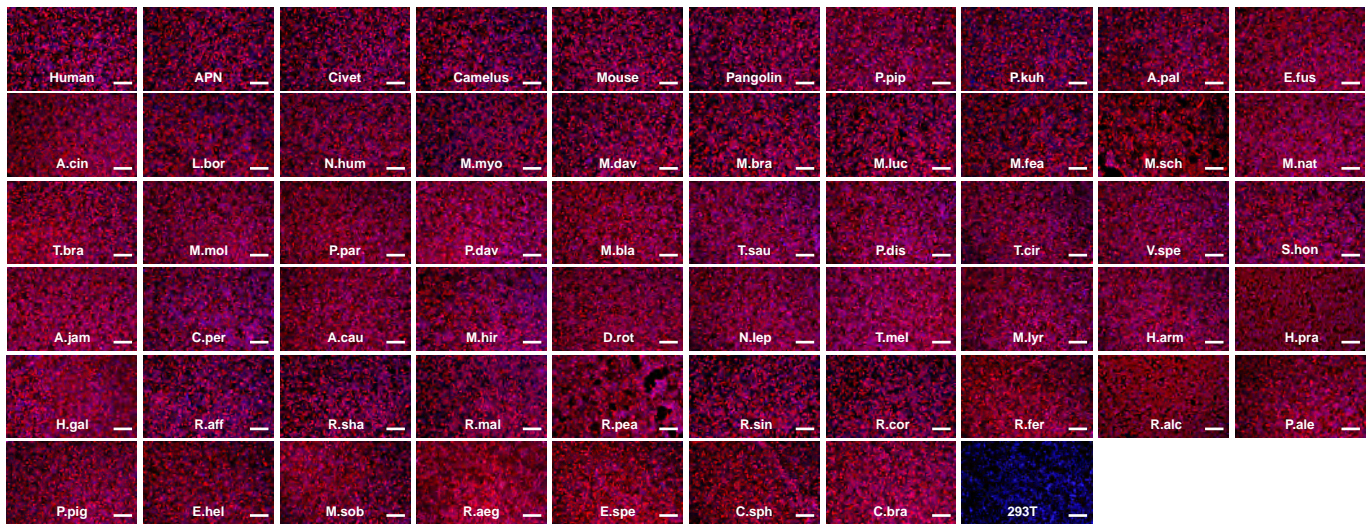

**Extended Data Fig. 6| Immunofluorescence demonstrating a comparable expression of 56 ACE2 orthologues in HEK293T cells.** The representative images demonstrating the expression of ACE2 orthologues stably expressed in HEK293T cells by detecting the C- terminal fused 3×FLAG tags. The cell nuclei are stained with Hoechst 33342 in blue . Scale bar, 200  $\mu$ m. Human APN (APN) serves as the experimental control.

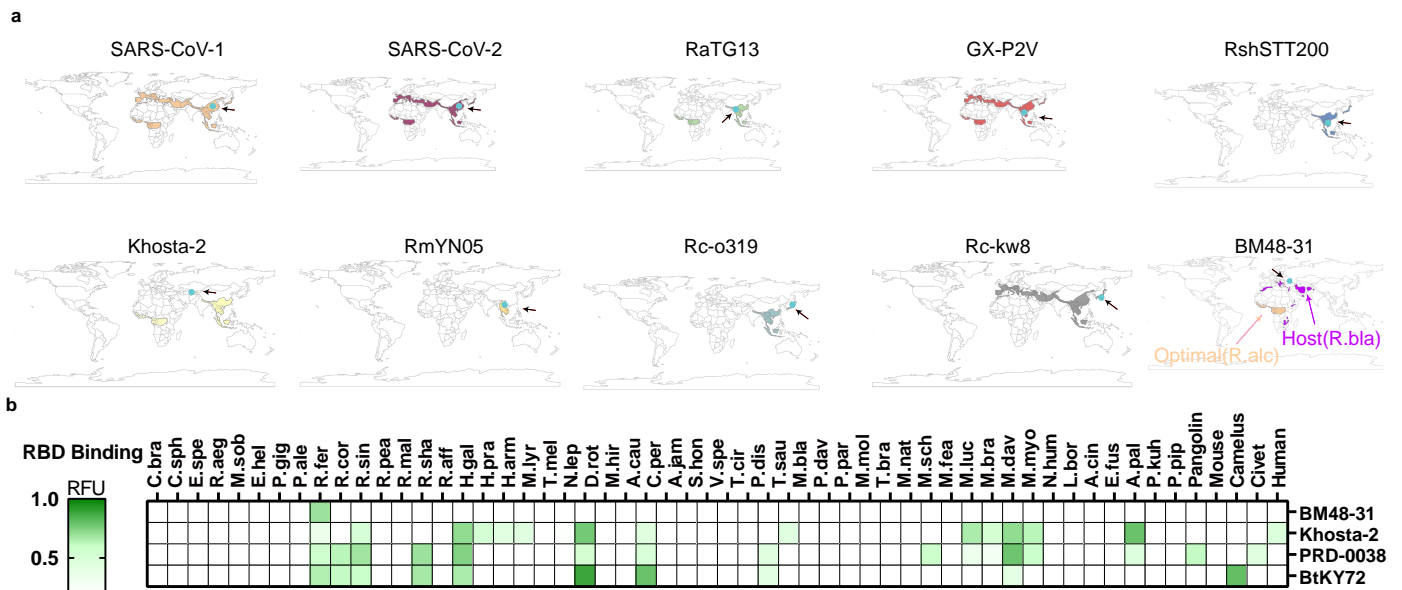

**Extended Data Fig. 7 | The geographical distribution of Rhinolophus bat species with ACE2 supporting the entry of indicated sarbecovirus (a) and Clade3 sarbecoviruses RBD binding efficiencies with 56 ACE2 orthologues (b).**

The distribution data are based on ACE2 usage data from Fig. 2b, c. Teal circles: the sampling locations of the sarbecoviruses. For BM48-31, the distribution of the species with the optimal ACE2 orthologue (R.alc) was shown since the sequences of the host (R.bla) ACE2 remains unavailable. RBD-hFc binding was conducted in HEK293T cells expressing the indicated orthologues.

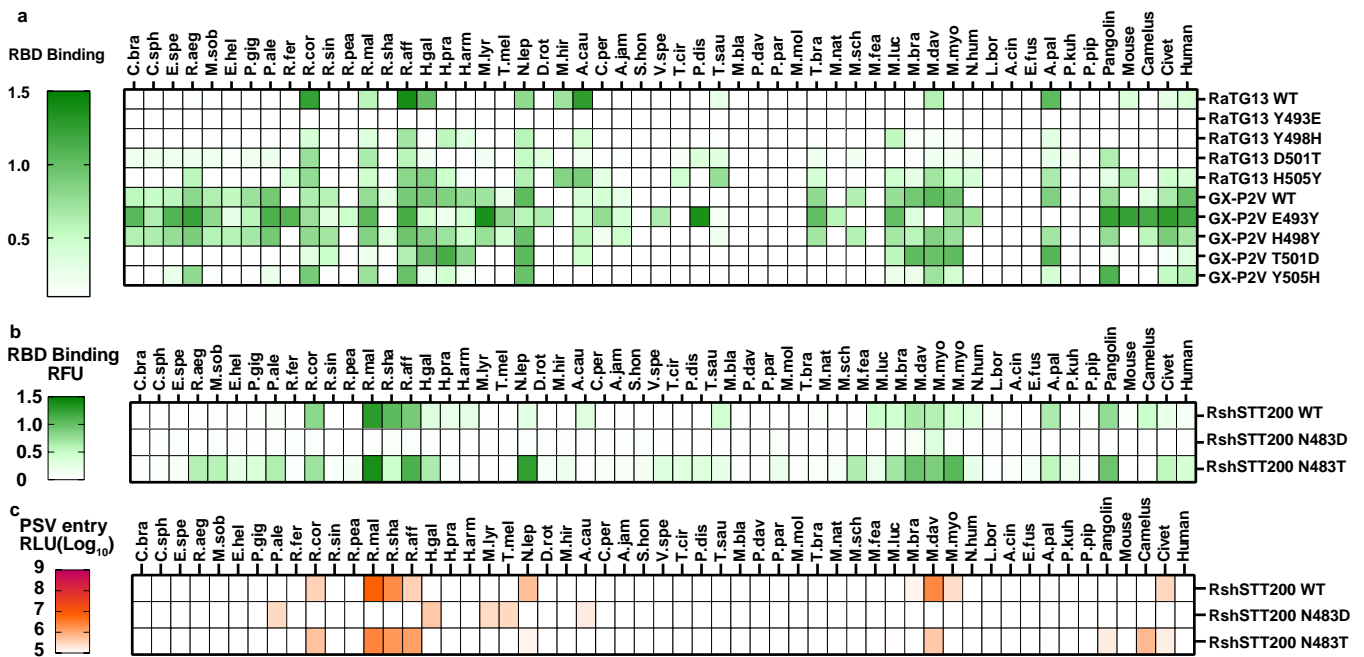

**Extended Data Fig. 8 | Critical RBM residues affecting the multi-species ACE2 usage spectra of sarbecoviruses.**

**a**, Heat map displaying the RBD binding efficiencies of RaTG13 and GX-P2V swap mutants at different RBM residues (a) in HEK293T expressing the indicated ACE2 orthologues. **b**, **c**, Heat map displaying RBD binding(**b**) and PSV entry(**c**) efficiencies of RshSTT200 carrying position 501<sub>SARS-CoV-2</sub> related mutations.

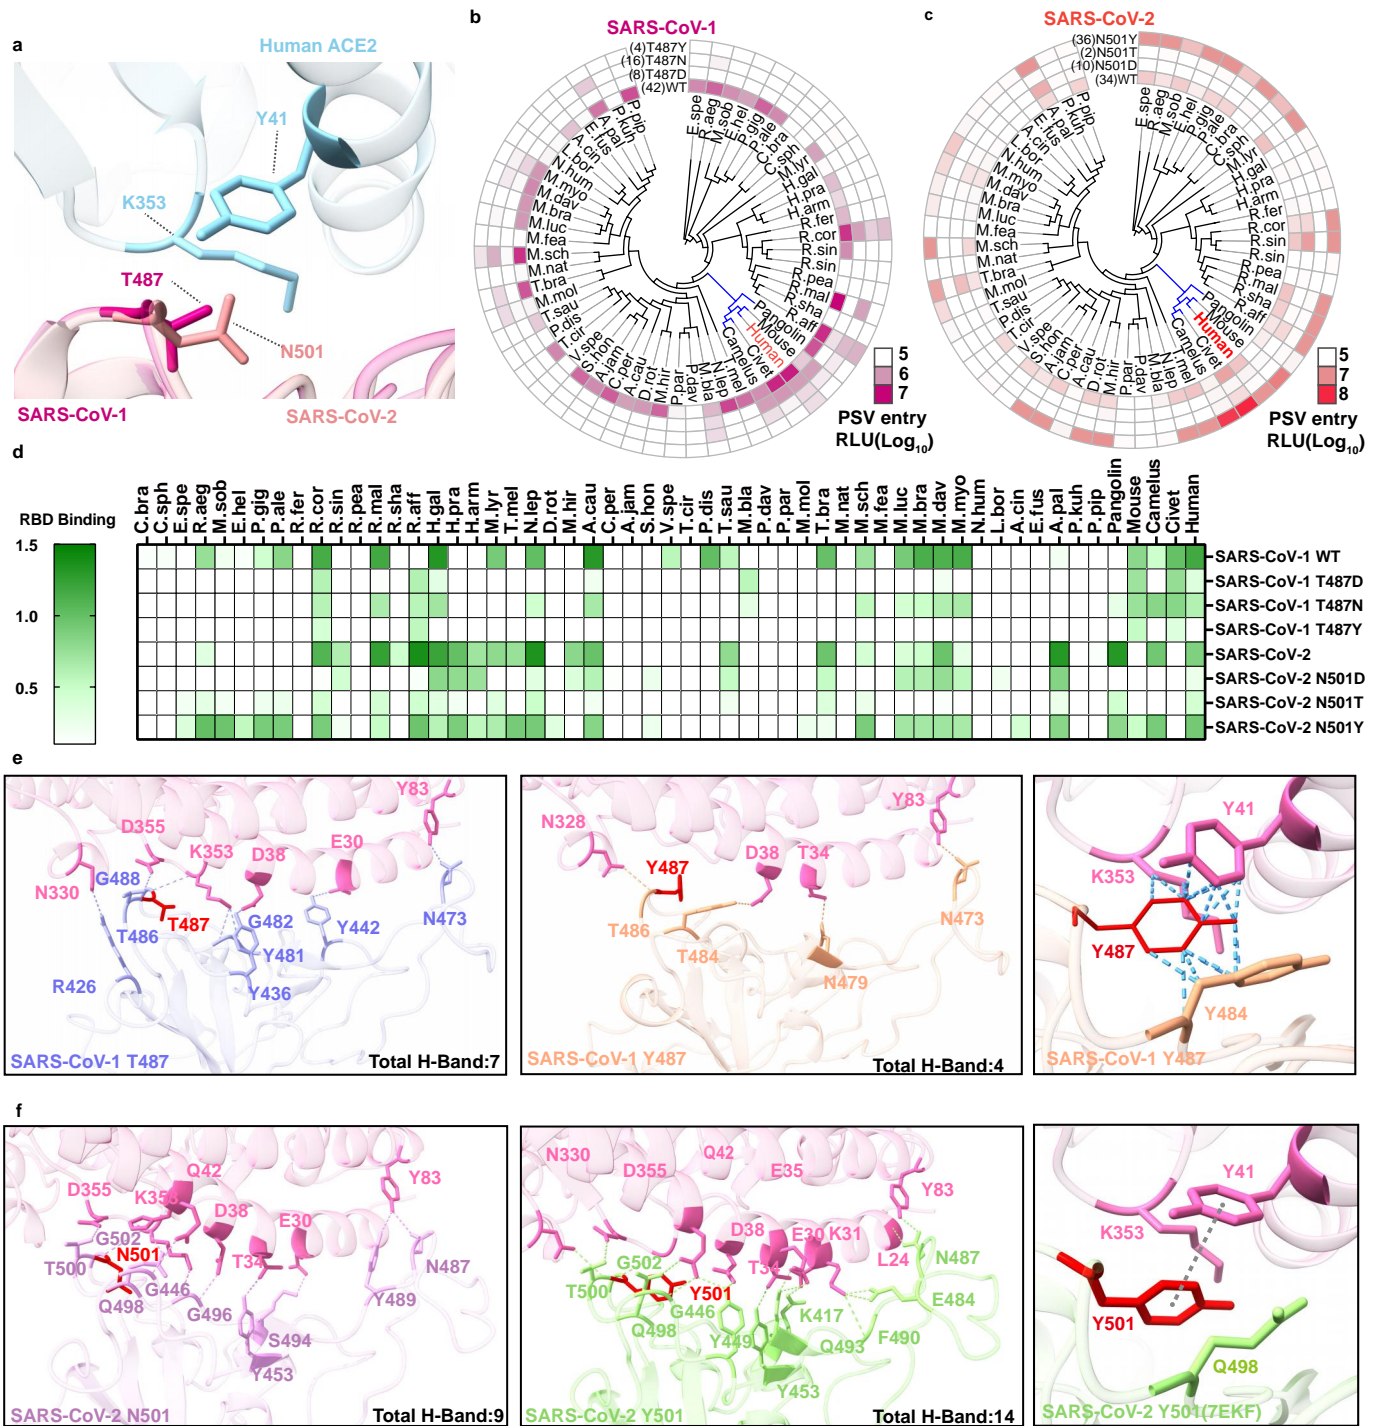

**Extended Data Fig. 9 | Residue usages in position 501<sub>SARS-CoV-2</sub> affecting the multi-species ACE2 usage spectra of SARS-CoV-1 and SARS-CoV-2.** **a**, Superimposition of the structures illustrating the critical residues for the interaction between SARS-CoV-1/SARS-CoV-2 and human ACE2. **b-d**, Heat map displaying the PSV entry efficiencies of SARS-CoV-1 T487-related mutants (**b**) and SARS-CoV-2 N501-related mutants (**c**), alongside correspond RBD binding (**d**) in HEK293T cells expressing the indicated ACE2 orthologues. PSV entry > 5% is considered as an effective entry and the number of ACE2 support entry is showed in parentheses. **e, f**, Structure modeling of RBD-ACE2 complex illustrating the impact of T487Y<sub>SARS-CoV-1</sub> (**e**) and N501Y<sub>SARS-CoV-2</sub> (**f**) mutations on ACE2 interaction, respectively. Blue dashed line: clash. Gray dashed line:  $\pi$ - $\pi$  stacking interaction.

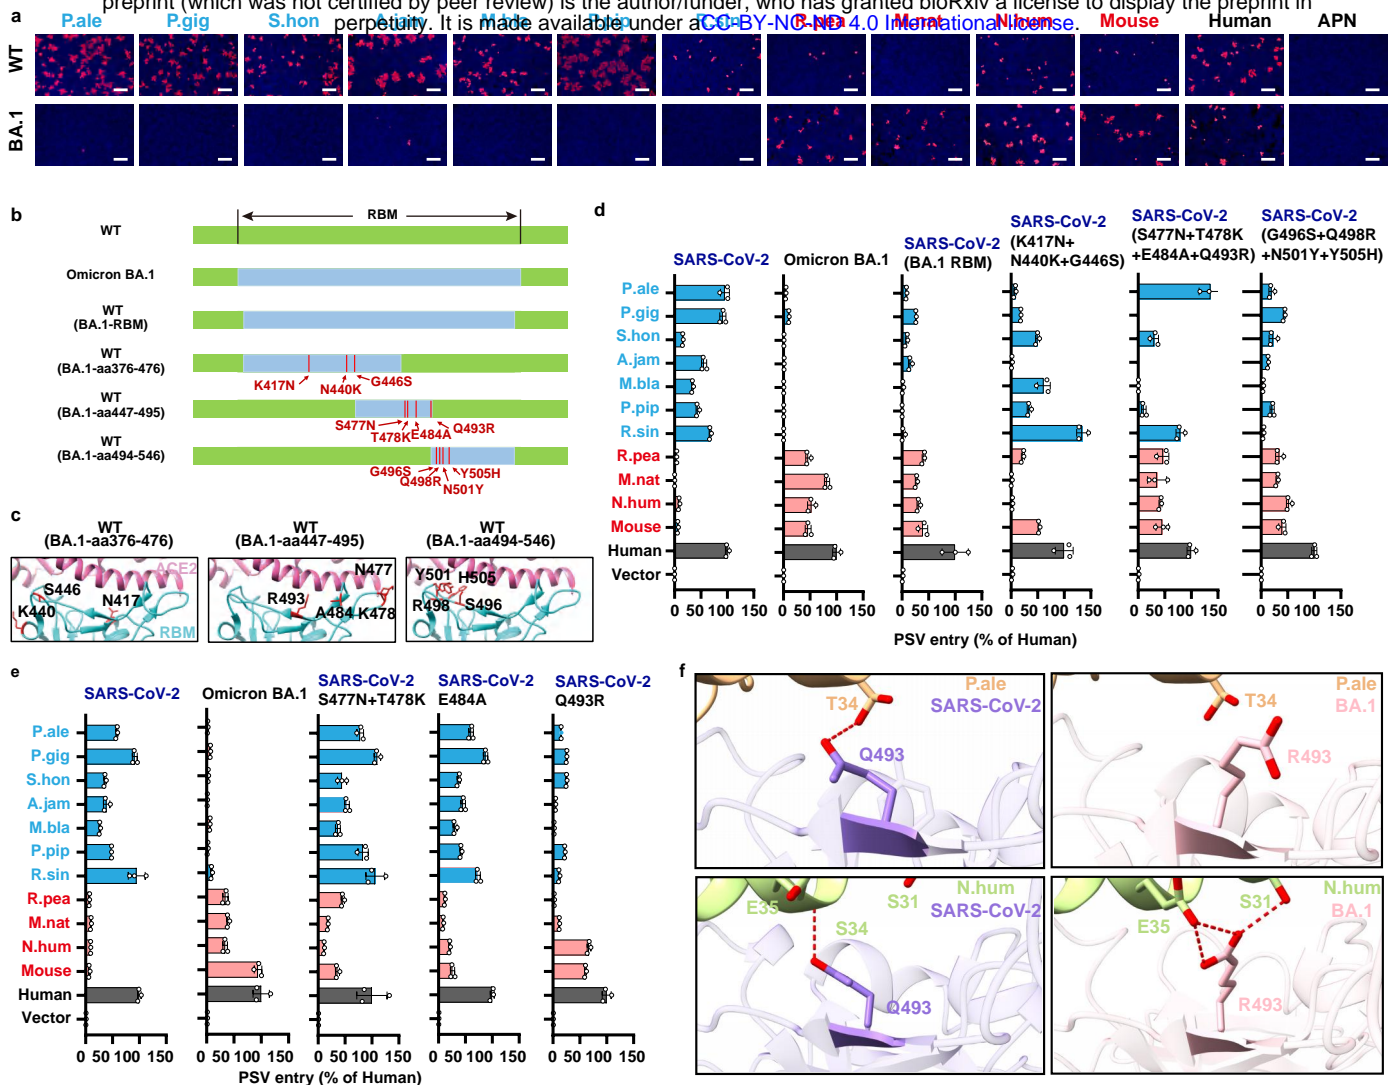

**Extended Data Fig. 10 | The critical RBM residues responsible for the alteration of multi-species ACE2 usage spectra of Omicron BA.1.** **a**, The authentic SARS-CoV-2 (WT) and Omicron BA.1(BA.1) infection in HEK293T stably expressing the ACE2 orthologues showing contrasting entry supporting ability in PSV entry assays (Fig. 2j). Infection efficiencies were examined by immunofluorescence detecting the intracellular N protein. Red font: increased efficiency to support BA.1; Blue font: reduced efficiency to support BA.1. Scale bars, 200  $\mu$ m. **b**, Schematic diagram illustrating the SARS-CoV-2 mutants with RBM regions swapped between WT and BA.1. **c**, The structural details of the swapped residues within the interaction interface (6M0J). **d**, **e**, The PSV entry efficiencies of the indicated SARS-CoV-2 mutants carrying region substitutions (**d**) or point mutations (**e**) in HEK293T expressing the indicated ACE2 orthologues. **f**, Structure modeling of SARS-CoV-2 WT or BA.1 RBD in complex with P.ale or N.hum ACE2. The distinct interactions mediated by residue in position 493 SARS-CoV-2 were indicated in each model. Red dashed line: H-Bond. The bat ACE2 structures are predicted by AlphaFold2 and the complex structures are predicted by HDock, SARS-CoV-2 RBD: 6M0J; SARS-CoV-2-BA.1 RBD: 7UON.



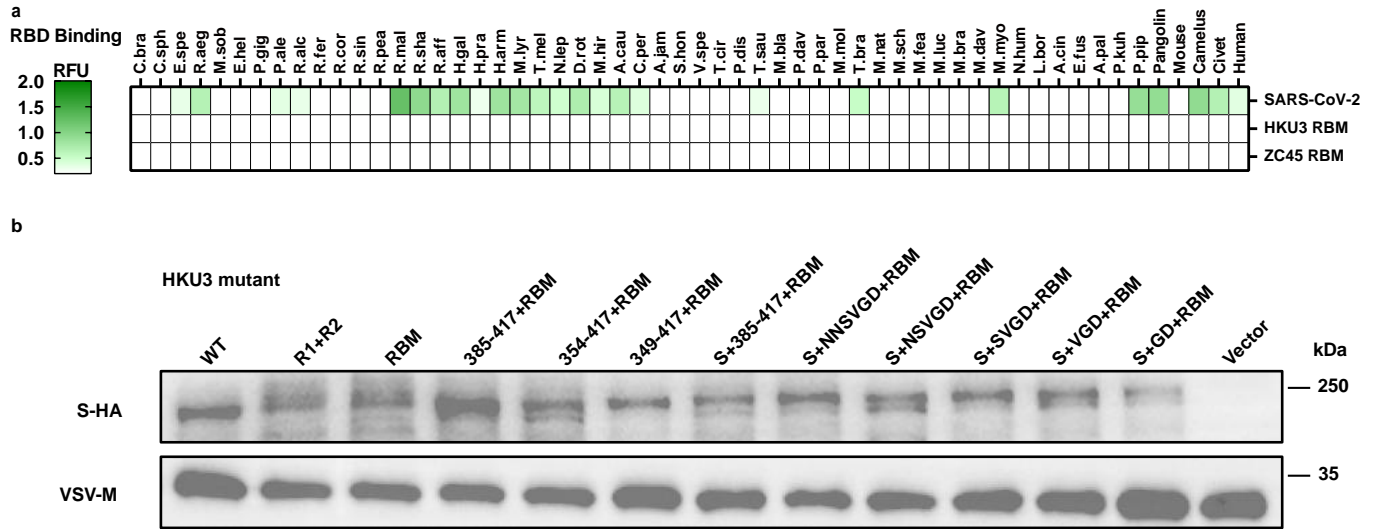

Extended Data Fig. 11| RBD binding efficiency of HKU3 and ZC45 RBM in HEK293T expressing indicated ACE2 orthologues (a) and Western blot detecting the PSV packaging efficiencies of HKU3 (b).

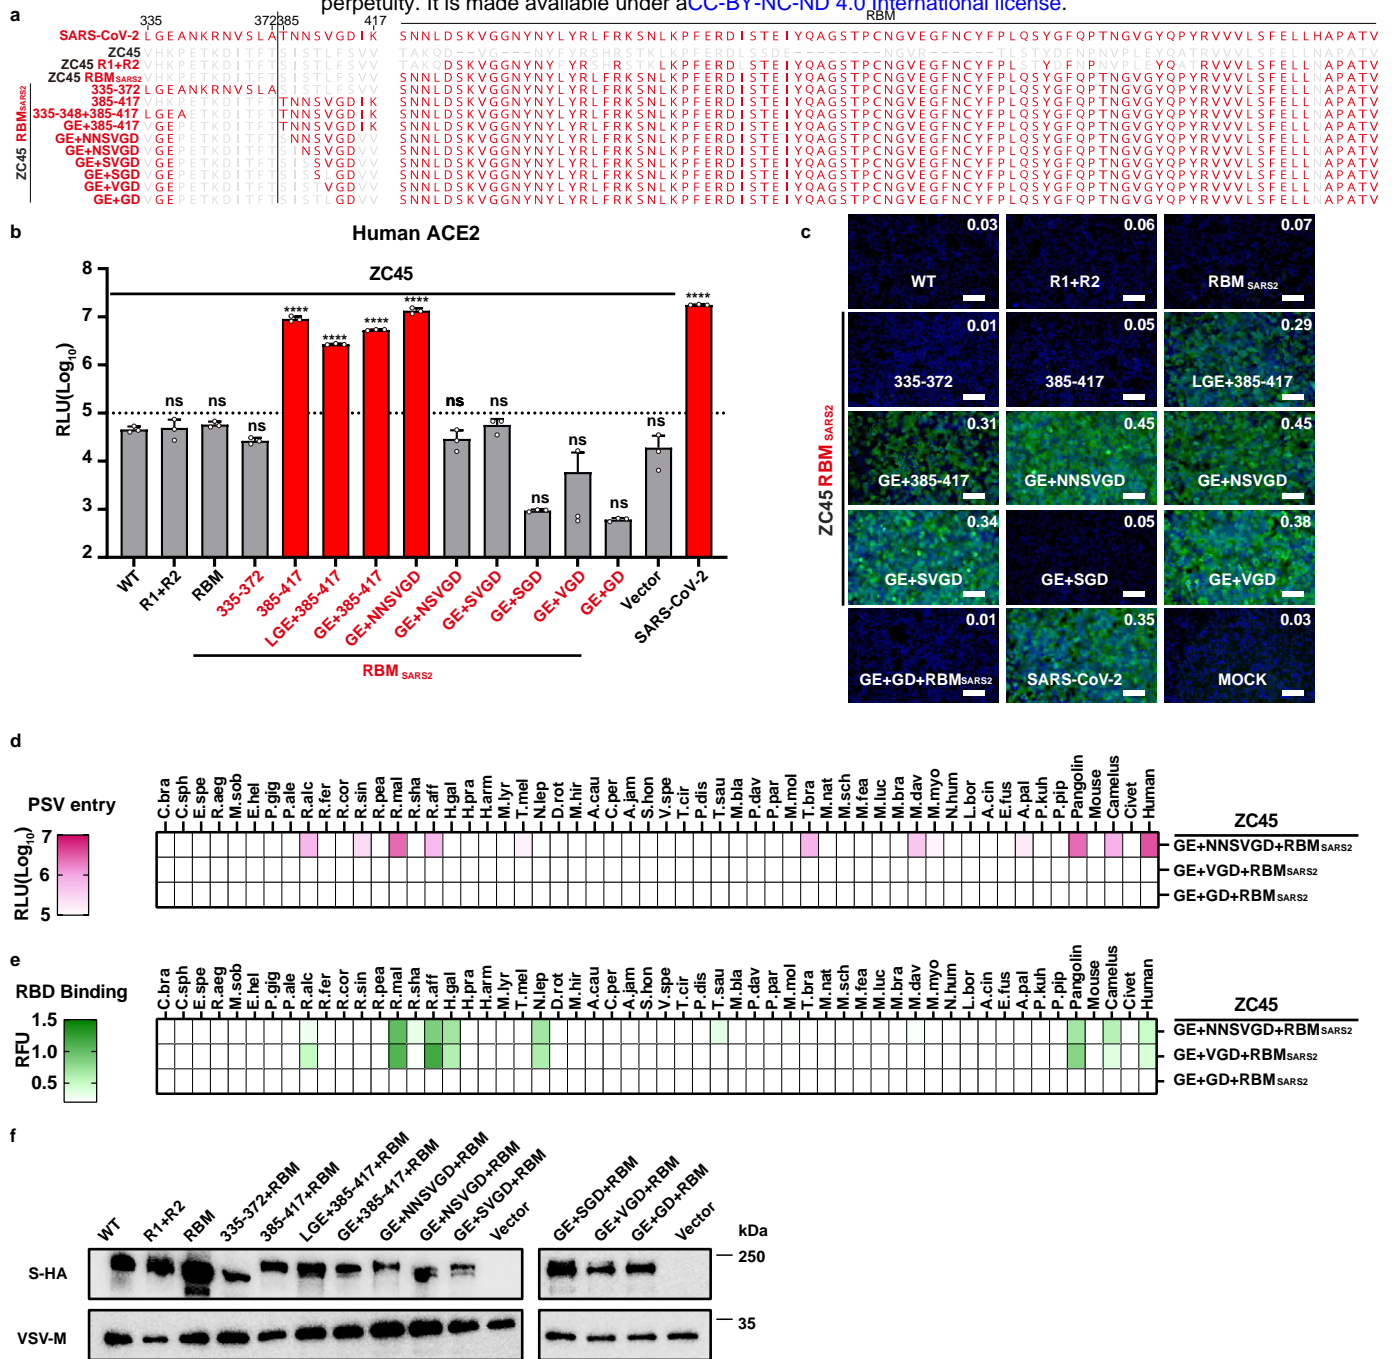

**Extended Data Fig. 12 | Fine mapping of Clade-2 specific residues outside the ZC45 RBM restricting ACE2 recognition.** **a**, Schematic illustration of the mapping strategy to narrow down the critical determinants on ZC45 for ACE2 receptor function. **b, c**, PSV entry (**b**) and RBD binding (**c**) of the ZC45 mutants in HEK293T cells stably expressing hACE2. One-way ANOVA analysis, followed by Dunnett's test for **d** and **h**, mean  $\pm$  SD. Mock: medium control. Scale bar, 100  $\mu$ m. GFP RLU is marked on the top right corner. **d, e**, PSV entry (**d**) and RBD binding (**e**) of ZC45 mutants with restored ACE2 binding affinity in HEK293T expressing the indicated ACE2 orthologues. **f**, Western blot illustrating the spike protein package efficiencies of ZC45 mutants in PSV particles.

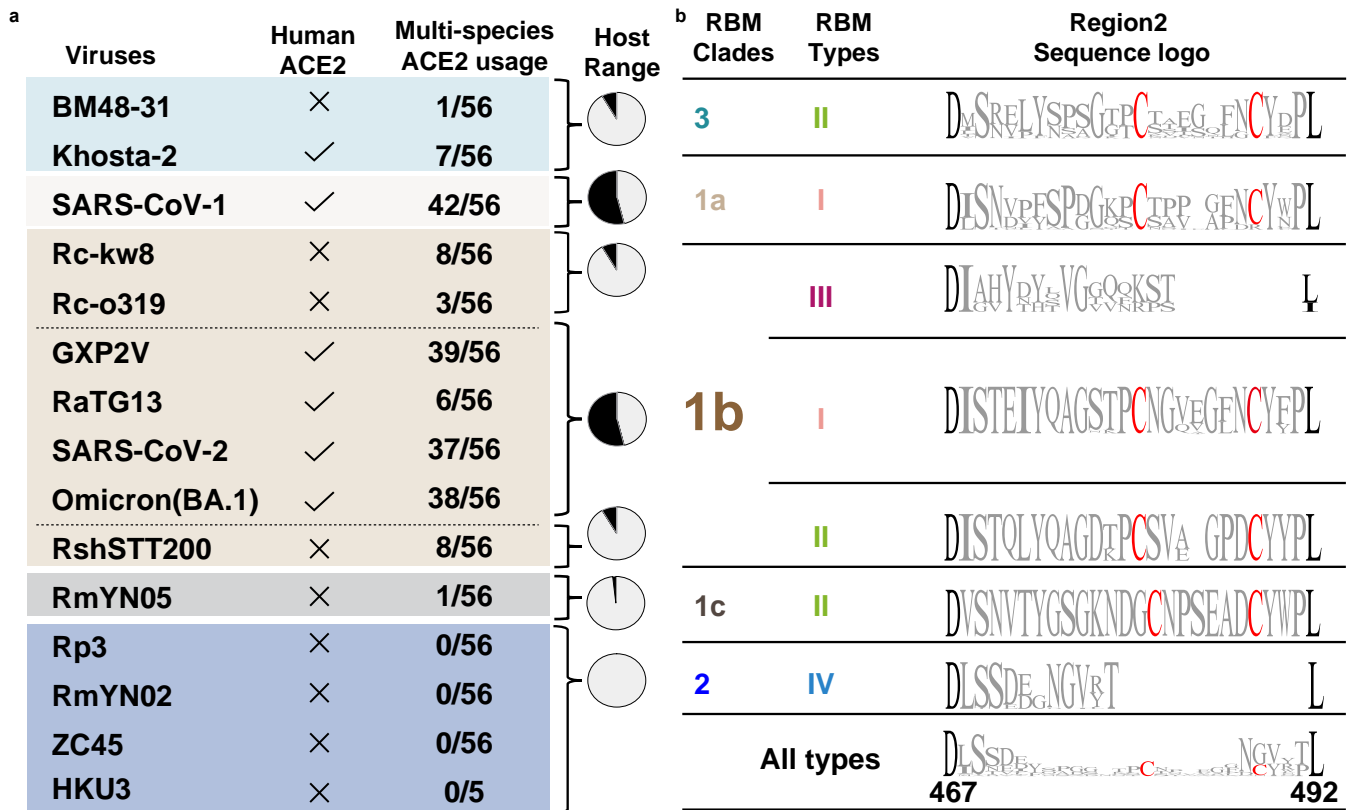

**Extended Data Fig. 13 | RBM Region 2 sequence logos and ACE2 usage spectra of sarbecoviruses. a**, Summary of the number of acceptable ACE2 orthologues (data based on Fig.2a and j,  $RLU > 2 \times 10^5$  is considered as positive) and hACE2 compatibility of the indicated sarbecoviruses. Coloring is based on different RBD clades. **b**, Region2 Sequence Logo analysis of sarbecoviruses grouped by different indel types in each clade. The highly conserved D467 and L/492 (black) (SARS-CoV-2 numbering) for defining the boundary of Region 2 and the featured cystines (red) are highlighted with black and red, respectively.

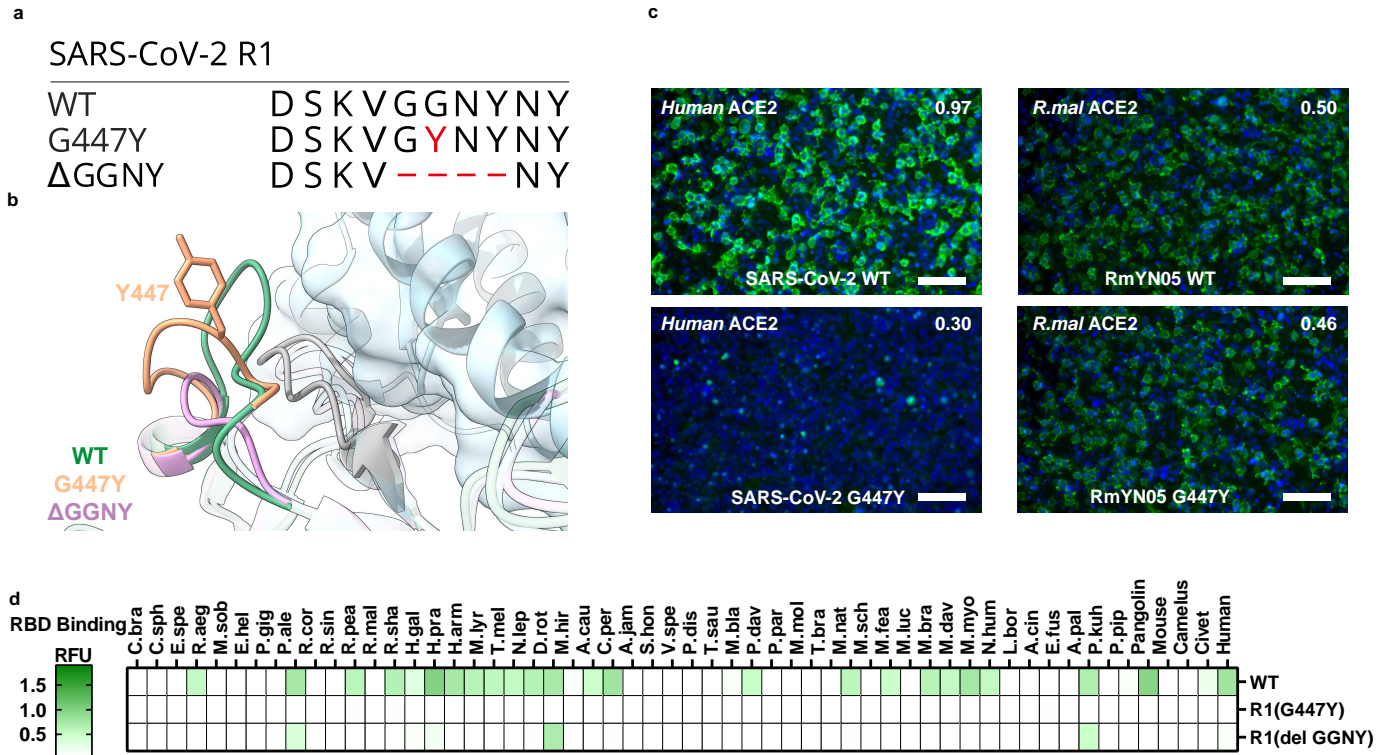

**Extended Data Fig. 14| The importance of the conserved RBM Region 1 Glycine (G) on SARS-CoV-2 and ACE2 interaction. a, b, Illustration (a) and structural modeling (b) elucidating the potential impact of SARS-CoV-2 Region 1 mutations on hACE2 interaction (based on 6M0J and AlphaFold2). c, The impact of SARS-CoV-2-G447Y mutation and the correspond mutation in RmYN05 on RBD binding efficiencies with host ACE2. Scale bar, 100 μm. d, RBD-hFc binding efficiencies of the indicated SARS-CoV-2 RBM Region 1 mutants in HEK293T expressing the indicated ACE2 orthologues.**

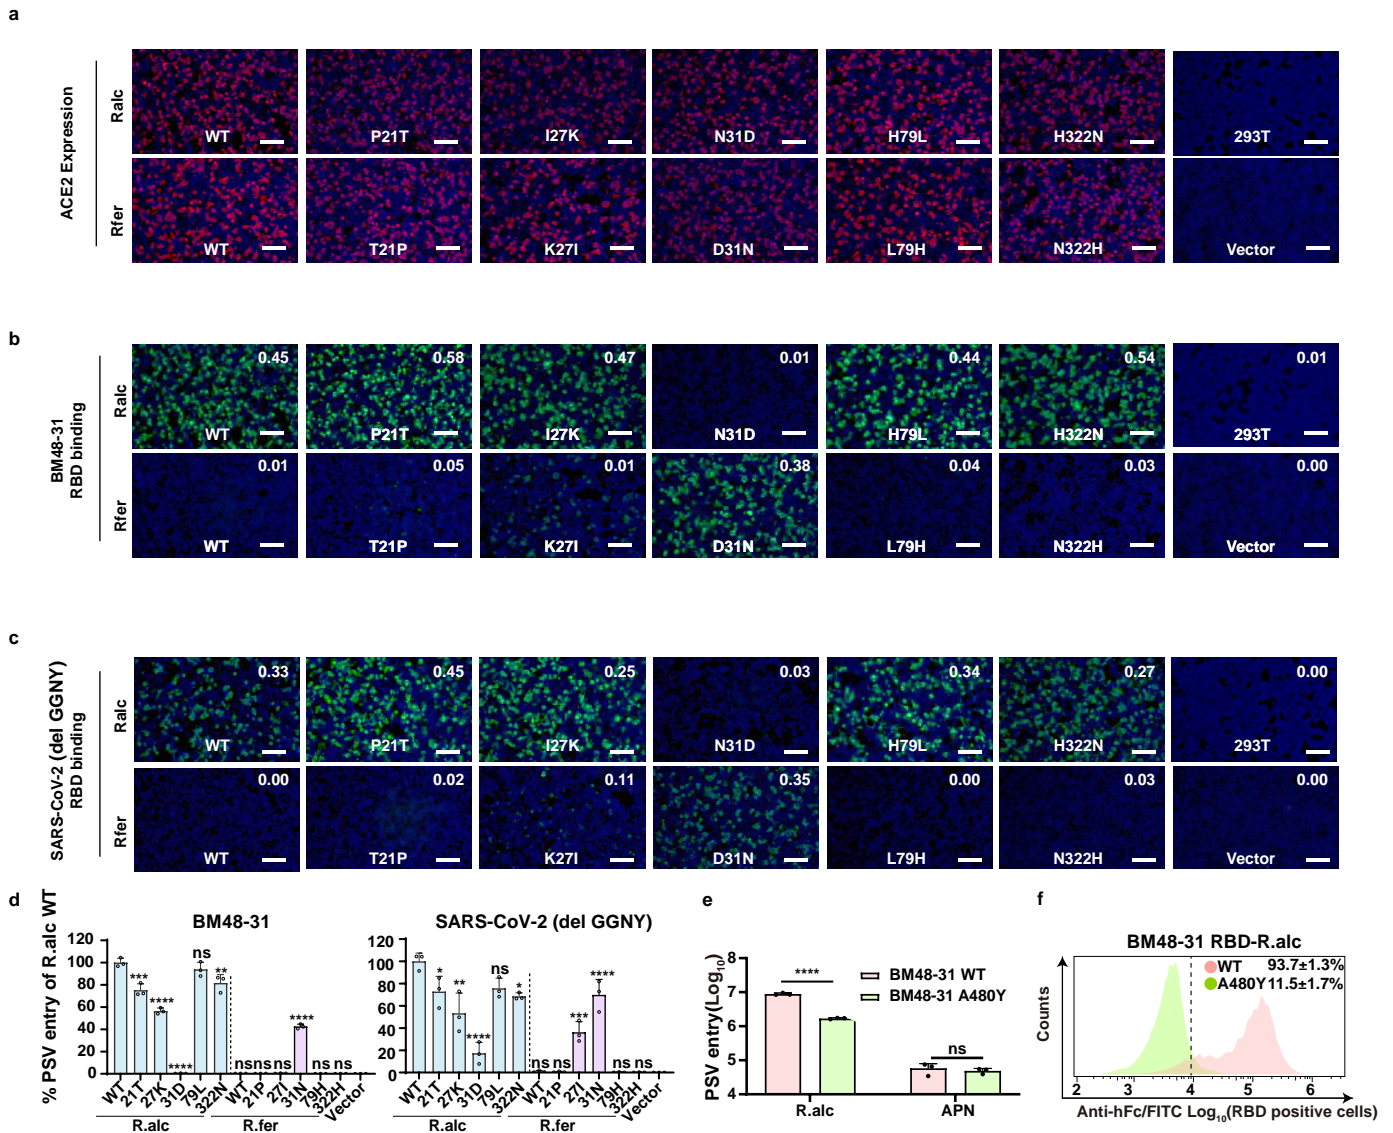

**Extended Data Fig. 15 | N31<sub>R.alc</sub> is critical for efficient PSV entry and RBD binding for both BM48-31 and SARS-CoV-2 Δ1(Region1 GGNY deletion).** **a**, Expression of R.alc and R.fer ACE2 swap mutants in HEK293T cells by detecting the C-terminal fused FLAG tags. **b-d**, BM48-31(**b**) and SARS-CoV-2 ΔGGNY (**c**) RBD-hFc binding efficiencies and corresponding PSV entry (**d**) in HEK293T expressing indicated R.alc or R.fer ACE2 swap mutants. **e**, **f**, PSV entry (**e**) and Flow cytometry (**f**) demonstrating the reduced R.alc ACE2 usage upon A480Y<sub>BM48-31</sub> mutation. \*: P<0.05, \*\*: P<0.01, \*\*\*: P<0.001, \*\*\*\*: P<0.0001. The RFU corresponding to each image are indicated on the top right corner. Scale bar: 200 μm. One-way ANOVA analysis, followed by Dunnett's test, was used for statistical analysis of significance. Two-tailed unpaired (Student's) t-test was performed if only two conditions were compared. Bar charts presented in mean ± s.d.

## Graphic Abstract

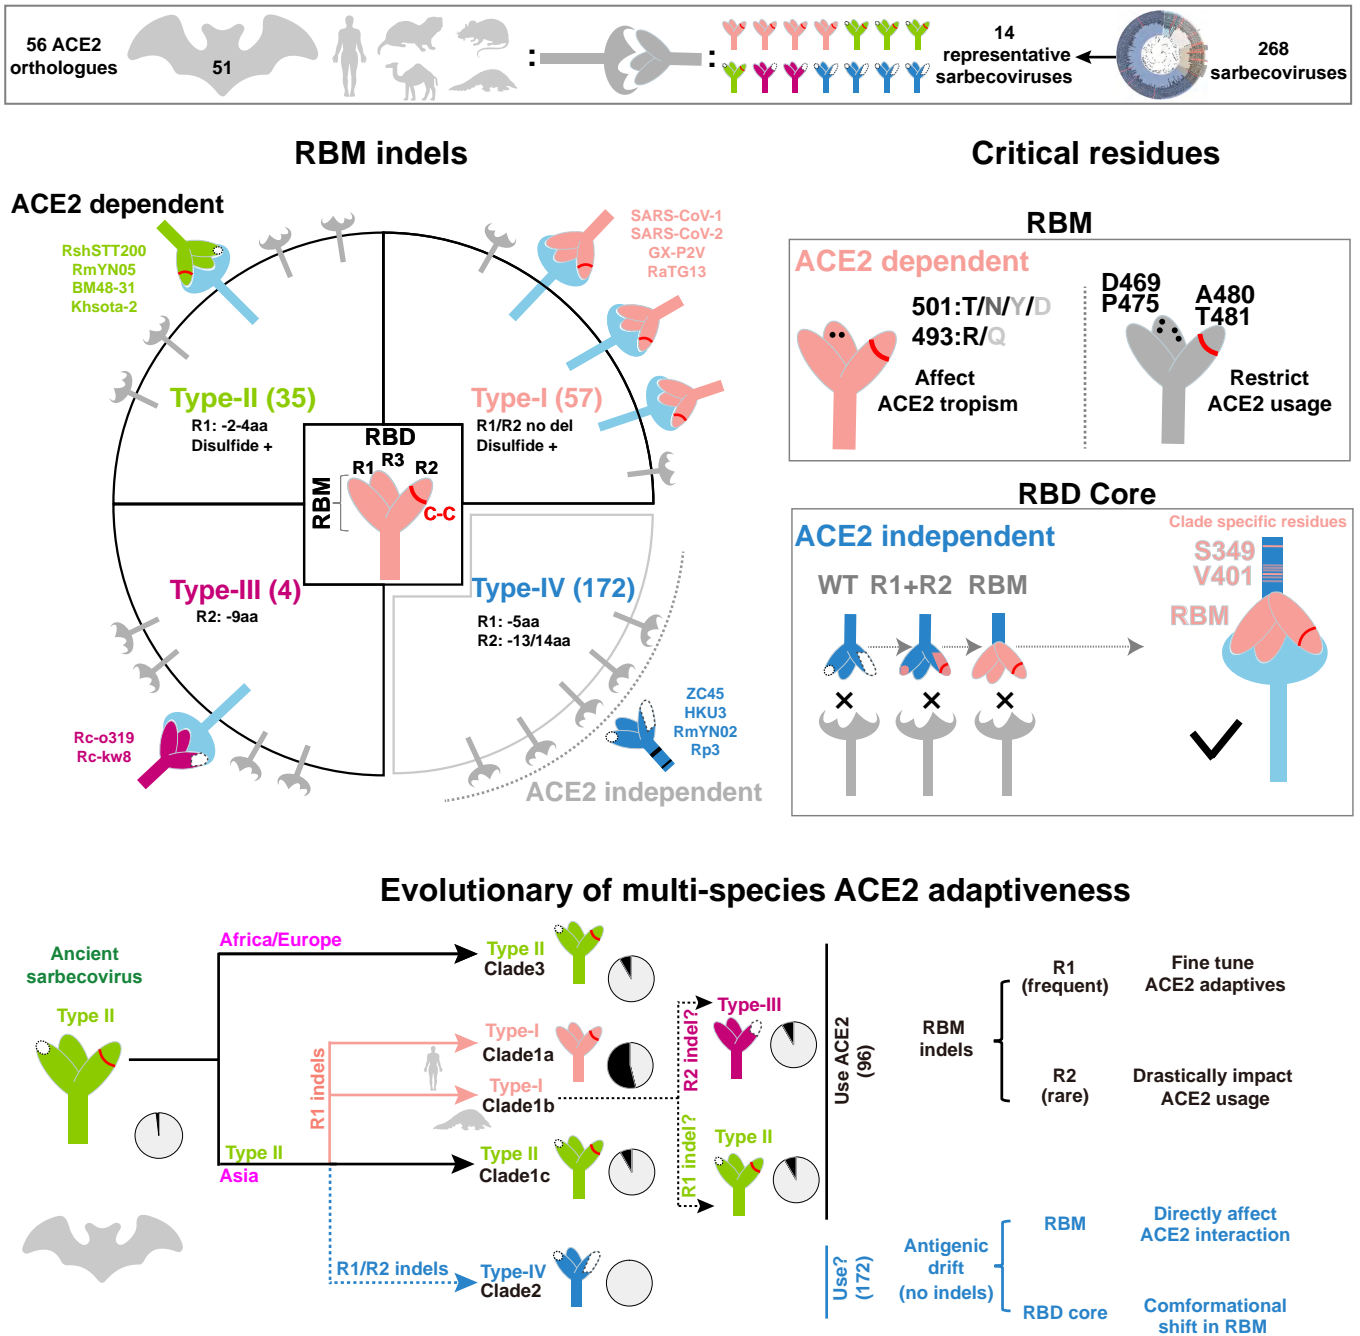

**Extended Data Fig. 16 | Graphic Abstract.** Multi-species ACE2 tropism of sarbecoviruses of different RBM types and the proposed evolutionary of their multi-species ACE2 adaptiveness.
